1 **BA.1 and BA.2 sub-lineages of Omicron variant have comparable replication**  
2 **kinetics and susceptibility to neutralization by antibodies**

3 **Running title:** Replication kinetics of SARS-CoV-2 variants

4 Janmejay Singh<sup>1\*</sup>, Aleksha Panwar<sup>1\*</sup>, Anbalagan Anantharaj<sup>1\*</sup>, Chitra Rani<sup>1</sup>, Monika  
5 Bhardwaj<sup>1</sup>, Parveen Kumar<sup>1</sup>, Kamal Pargai<sup>1</sup>, Partha Chattopadhyay<sup>2,3</sup>, Priti Devi<sup>2,3</sup>,  
6 Ranjeet Maurya<sup>2,3</sup>, Pallavi Mishra<sup>2</sup>, Anil Kumar Pandey<sup>4</sup>, Rajesh Pandey<sup>2</sup> and  
7 Guruprasad R. Medigeshi<sup>1#</sup>

8 1. Bioassay Laboratory and Clinical and Cellular Virology Laboratory, Translational  
9 Health Science and Technology Institute, Faridabad, Haryana. INDIA.

10 2: INtegrative GENomics of HOst-PathogEn (INGEN-HOPE) laboratory, CSIR-Institute  
11 of Genomics and Integrative Biology, Delhi, INDIA.

12 3: Academy of Scientific and Innovative Research (AcSIR), Ghaziabad-201002, India.

13 4: Employees State Insurance Corporation Medical College and Hospital, Faridabad,  
14 Haryana, INDIA.

15 **\* These authors contributed equally**

16 **# Corresponding author:**

17 Guruprasad R. Medigeshi, PhD

18 Translational Health Science and Technology Institute,

19 NCR-Biotech Science Cluster,

20 P.O. Box # 4, Faridabad-Gurugram Highway,

21 Faridabad 121001. INDIA.

22 Tel: +91-0129-2876311.

23 Email: [gmedigeshi@thsti.res.in](mailto:gmedigeshi@thsti.res.in)

24 **ABSTRACT**

25 The Omicron variant of SARS-CoV-2 is capable of infecting unvaccinated, vaccinated  
26 and previously-infected individuals due to its ability to evade neutralization by  
27 antibodies. With three sub-lineages of Omicron emerging in the last four months, there  
28 is inadequate information on the quantitative antibody response generated upon natural  
29 infection with Omicron variant and whether these antibodies offer cross-protection  
30 against other sub-lineages of Omicron variant. In this study, we characterized the  
31 growth kinetics of Kappa, Delta and Omicron variants of SARS-CoV-2 in Calu-3 cells.  
32 Relatively higher amounts infectious virus titers, cytopathic effect and disruption of  
33 epithelial barrier functions was observed with Delta variant whereas infection with  
34 Omicron variant led to a more robust induction of interferon pathway, lower level of virus  
35 replication and mild effect on epithelial barrier. The replication kinetics of BA.1 and BA.2  
36 sub-lineages of the Omicron variant were comparable in cell culture and natural  
37 Omicron infection in a subset of individuals led to a significant increase in binding and  
38 neutralizing antibodies to both BA.1 and BA.2 sub-lineages but these levels were lower  
39 than that produced against the Delta variant. Finally, we show that  $\text{Cu}^{2+}$ ,  $\text{Zn}^{2+}$  and  $\text{Fe}^{2+}$   
40 salts inhibited *in vitro* RdRp activity but only  $\text{Cu}^{2+}$  and  $\text{Fe}^{2+}$  inhibited both the Delta and  
41 Omicron variants in cell culture. Thus, our results suggest that high levels of interferons  
42 induced upon infection with Omicron variant may counter virus replication and spread.  
43 Waning neutralizing antibody titers rendered subjects susceptible to infection by  
44 Omicron variant and natural Omicron infection elicits neutralizing antibodies that can  
45 cross-react with other sub-lineages of Omicron and other variants of concern.

46 **KEYWORDS:** SARS-CoV-2; COVID-19; Delta variant; Omicron; RdRp; Copper; Iron

## 47 INTRODUCTION

48 Close to 17 million cases of COVID-19 was reported from India during the second wave  
49 of SARS-CoV-2 from March 2021 to June 2021 overwhelming the public health  
50 infrastructure resulting in close to 40% of the >500,000 deaths that has occurred in this  
51 pandemic. The surge was due to novel SARS-CoV-2 variant from the lineage B.1.617.2  
52 (Delta variant) which was shown to be more virulent with shorter incubation periods and  
53 ability to cause severe disease([1-4](#)). Many reports have shown that the neutralizing  
54 antibodies from prior infection or that elicited by some of the licensed COVID-19  
55 vaccines show a decrease in the efficiency to neutralize the Delta variant thereby  
56 compromising vaccine efficacy against this variant([5-7](#)). Delta variant was the major  
57 circulating SARS-CoV-2 variant until the emergence of B.1.1.529 (Omicron) variant in  
58 November 2021 which has now replaced the Delta variant in most of the countries. The  
59 ongoing third wave of SARS-CoV-2 infections, which is on the decline and attributed to  
60 the Omicron variant of SARS-CoV-2, has resulted in milder symptoms and lower  
61 hospitalizations. In addition to the less virulent Omicron variant, increased vaccination  
62 coverage and hybrid immunity may have contributed to reduced impact of third wave in  
63 India. Three sub-lineages of Omicron (BA.1, BA.2 and BA.3) have emerged and are  
64 currently circulating in India and other parts of the world([8](#)). The success of Omicron  
65 variant and its sub-lineages in driving the current phase of the pandemic has been  
66 attributed to a large number of mutations leading to escape from neutralizing antibodies  
67 generated by prior infection or vaccination([9-12](#)). Recent reports suggest that the  
68 antibody response between the sub-lineages may not be significantly different and

69 exposure to one of the sub-lineages offers cross-protection against other members of  
70 Omicron sub-lineage and also against past variants([13](#), [14](#)).

71

72 In addition to evading humoral immunity, data from animal models suggest that the  
73 success of SARS-CoV-2 variants of concern (VoCs) in driving new waves of infection  
74 can be attributed to multiple factors such as increased virulence, enhanced  
75 transmission, altered pathogenicity and replication fitness([15-20](#)). Therefore, efforts to  
76 characterize and understand the replication kinetics of circulating VoCs would provide  
77 information on virulence mechanisms, immune evasion properties and augment our  
78 ability to develop therapeutic strategies. In this study, we compared the replication  
79 kinetics of some of the SARS-CoV-2 VoCs namely, the Kappa and Delta variants and  
80 BA.1 and BA.2 sub-lineages of Omicron variant in human lung epithelial  
81 adenocarcinoma (Calu-3) cells grown on transwells and also in air-liquid interface  
82 models. We monitored the interferon response and its downstream effectors in infected  
83 cells and tested the effect of divalent cations on virus infection and RNA-dependent  
84 RNA polymerase (RdRp) activity. We show that both binding and neutralizing antibodies  
85 wane by >50% in six months in a cohort of participants with hybrid immunity. Natural  
86 exposure to the Omicron variant led to a significant increase in binding and neutralizing  
87 antibodies to BA.1 and BA.2 sub-lineages of Omicron. The levels of neutralizing  
88 antibodies were higher against the Delta variant as compared to the Omicron sub-  
89 lineages. These data suggest that Omicron infection elicits neutralizing antibodies that  
90 can cross-react with other sub-lineages of Omicron and other VoCs in people with  
91 hybrid immunity. Our results provide clues to the relative replication fitness of these

92 VoCs and their ability to induce interferon responses and susceptibility to divalent  
93 cations and may help to develop novel strategies to counter viral replication.

94

## 95 **RESULTS**

### 96 **Peak COVID-19 positivity in second wave coincides with high viral load**

97 A total of 117,434 NP/OP swab samples were tested for COVID-19 by RT-PCR at the  
98 bioassay laboratory of the institute from April 2020 to July 2021. Peak positivity in the  
99 year 2020 was observed in the months of June-July with 15% positivity during these  
100 months (Supplementary Fig. S1A(i)). Previous reports have identified B.6 lineage as  
101 one of the predominant lineages during this period circulating in India ([21](#), [22](#)). We have  
102 isolated few clinical isolates from B.6 lineage as reported earlier and plaque-purified one  
103 of the isolates which was used in this study as a representative of ancestral virus isolate  
104 ([23](#)). The number of positive cases was around 10% of the total samples tested until  
105 November 2020 and dropped drastically to around 0.1% of the total tested samples in  
106 the month of February 2021 (Supplementary Fig. S1A(ii)). Although only 8 of the 8012  
107 tested samples were RT-PCR positive in February 2021, 4 of these 8 samples had RT-  
108 PCR cycle threshold (Ct) values <20 and 2 with Ct values between 20-25. RT-PCR  
109 positivity jumped to 1.1% (85 out of 7558) in March with over 50% of the positive  
110 samples having Ct values of <25 clearly indicating a large number of infections with a  
111 high viral load during February and March 2021 (Supplementary Fig. S1B). The  
112 following months of April and May saw a sudden spike in the peak positivity rate which  
113 increased to 27.7% and 24.5% which is now termed as the "second wave" and the  
114 SARS-CoV-2 variants from B.1.617.1/2 (Kappa/Delta) lineages have been attributed to

115 this sudden spike which overwhelmed the healthcare infrastructure leading to large  
116 scale mortality ([24](#)). 40% of the NP/OP samples tested in April 2021 had Ct values of  
117 less than 25 which reduced to 28% of the total samples in May indicating a high viral  
118 burden in patients during this period resulting in increased transmission of the virus  
119 among the contacts.

120

### 121 **Disruption of cellular junctions by SARS-CoV-2 Delta and Kappa variants**

122 We were able to isolate the B.1.617.1 (Kappa) and B.1.617.2 (Delta) variants from  
123 clinical samples and got the virus stocks verified by whole genome sequencing. We  
124 measured the growth kinetics of these two variants in comparison with the B.6 lineage  
125 virus. Calu-3 cells were infected with 0.01 MOI of SARS-CoV-2 from lineages B.6,  
126 B.1.617.1 and B.1.617.2 respectively. We estimated viral titers in the supernatants at 24  
127 and 48 h pi by plaque assay. Total RNA was isolated from cells at each time point for  
128 measuring copy numbers of N gene by quantitative RT-PCR. We observed a  
129 significantly higher viral titers with B.1.617.2 variant relative to B.6 lineage virus at 24 h  
130 pi. The virus titers at 48 h pi was reduced in both the Kappa and the Delta variant  
131 samples most probably due to the increased cytopathic effect at this time point (Fig.  
132 1A). However, no difference in N gene RNA copy numbers were detected between the  
133 three isolates by RT-PCR at either of the time-points (Fig. 1B). As SARS-CoV-2 was  
134 shown to disrupt tight junctions in Calu-3 and human airway epithelial cells ([23](#), [25](#)), we  
135 further assessed the effect of infection of B.6 and B.1.617.1 and B.1.617.2 variants on  
136 cellular junctions of polarized Calu-3 cells. Cells were grown on transwell culture inserts  
137 for 21 days to allow for polarization into apical and basolateral surface and formation of

138 permeability barrier as measured by the trans-epithelial electrical resistance (TEER).  
139 Polarized Calu-3 cells were infected with 0.3 MOI of each of the three virus isolates and  
140 the TEER was monitored for 48 hours. Cells that were either mock-infected or infected  
141 with B.6 lineage virus showed no significant change in TEER up to 48 h (Fig. 1C).  
142 Epithelial barrier function was disrupted by 48 h in cells infected with either the Kappa  
143 (B.1.617.1) or the Delta (B.1.617.2) variants. However, a significant decline in the TEER  
144 values was observed for the Delta variant (Fig.1C). Surprisingly, the virus titers in either  
145 the apical or basolateral chambers were not significantly different between the three  
146 isolates (Fig. 1D) at 48 h pi suggesting that the increasing cytopathogenicity by the  
147 Delta variant may be responsible for significantly higher disruption of lung epithelial  
148 barrier functions. These findings were further corroborated by confocal microscopy  
149 where transwell culture inserts were fixed at 48 h pi and stained with antibodies against  
150 SARS-CoV-2 nucleocapsid (N) protein, occludin (marker for tight junction) and  $\beta$ -  
151 catenin (marker for adherens junction) (Fig. 2). The staining pattern of both occludin and  
152  $\beta$ -catenin was comparable between mock- and B.6-infected cells. However, the same  
153 was perturbed in both the Kappa and the Delta variant infected cells and disruption of  
154 occludin staining appeared to be more drastic in cells infected with the Delta variant  
155 compared to the Kappa variant (Fig. 2). Our results suggest that the Delta variant  
156 infection has relatively more deleterious effects on epithelial cell functions most  
157 probably due to increased fusogenic functions leading to syncytia formation and cell  
158 death([19](#)).

159

160 **Infection with Omicron variant generates lower levels of infectious virus**

161 Delta variant was reported to have higher transmissibility and pathogenicity in humans  
162 and animal models([19](#), [26-28](#)) whereas Omicron variant showed attenuated growth([17](#),  
163 [29](#)). We performed growth curve analysis of SARS-CoV-2 viruses from the lineages B.6  
164 (isolate from 2020), B.1.617.2 (Delta) and B.1.1.529 (Omicron) in Calu-3 cells by  
165 infecting cells with 0.3 MOI and estimating viral genome equivalents (N gene) by qRT-  
166 PCR from infected cells and virus titers from culture supernatants by plaque assays at  
167 indicated time-points (Fig. 3). We found that viral RNA replication peaked by 24 h pi for  
168 both the B.6 and the Delta variants and both these isolates had comparable viral N-  
169 gene levels by qRT-PCR at all the time points. However, the same for Omicron variant  
170 was about 70% lower as compared to the other two lineages at all the time-points (Fig.  
171 3A). Similarly, viral titers in the supernatant increased from 12 h pi to 24 h pi and the  
172 levels were maintained at 36 h pi in the case of B.6 lineage virus. However, consistent  
173 with the sub-genomic N RNA levels, the viral titers for the Omicron variant was  
174 significantly lower compared to both B.6 and the Delta variant at all the time points (Fig.  
175 3B) which is in agreement with recent reports([30](#), [31](#)). These observations were further  
176 corroborated by western blot analysis performed with cell lysates prepared from infected  
177 cells collected in lysis buffer at 12 and 24 h pi where the N protein was consistently  
178 lower at both 12 and 24 h pi in cells infected with Omicron as compared to B.6 and  
179 Delta infection (Fig. 3C). To further verify whether the lower titers observed in the  
180 Omicron infection is due to compromised viral entry, we performed viral entry  
181 experiments by infecting cells with 5 MOI for one hour and estimated the amount of  
182 internalized RNA by qRT-PCR. We found that, contrary to reduced viral titers and viral  
183 RNA levels in Omicron infection, the intracellular viral RNA levels were higher as



184 compared to B.6 and the Delta variant suggesting that the reduced viral titers and viral  
185 RNA levels is not due to compromised viral entry into these cells (Fig. 3D).

186

### 187 **Interferon-dependent responses and reduced barrier disruption by Omicron** 188 **variant**

189 Innate immune responses mediated by interferons act as the first line of defence  
190 against viral infections and SARS-CoV-2 was found to be less capable of evading the  
191 interferon response compared to SARS-CoV-1(32) (33). Additionally, interferon induction  
192 coincided with viral clearance in young adults with mild SARS-CoV-2 infection  
193 suggesting a crucial role for antiviral response in resolving infection(34). We tested the  
194 induction of interferon-dependent antiviral response genes in cells infected with B.6,  
195 Delta and Omicron lineages. Total RNA isolated from Calu-3 cells after indicated time-  
196 points post-infection were used to estimate the transcript levels of interferon pathway  
197 genes by RT-qPCR (Fig. 4). We found that infection with Omicron variant led to  
198 significantly higher induction of interferon- $\beta$  (Fig. 4A) and the epithelial cell specific  
199 interferon- $\lambda$ 1 (Fig. 4B) and the downstream effectors of interferon pathway namely,  
200 interferon-stimulated gene 15 (ISG15) (Fig. 4C) and 2'-5'-oligoadenylate synthetase 1  
201 (OAS1) (Fig. 4D) at all the time-points tested suggesting that SARS-CoV-2 ancestral  
202 virus (B.6) and both the variants induce innate immune responses and lower levels of  
203 titers observed in the Omicron infected cells is due to robust induction of interferon  
204 pathway which is in agreement with previous reports(35). To further confirm that the  
205 lower levels of replication and infection by Omicron variant translates to compromised  
206 ability to disrupt the epithelial barrier functions, we compared the effect of Delta and

207 Omicron variant infection in an air-liquid culture model using Calu-3 cells. Cells were  
208 cultured on transwells at the air-liquid interface and infected with respective virus strains  
209 at 0.3 MOI. Trans-epithelial electrical resistance was monitored for 36 h (Fig. 5A). We  
210 observed a gradual insignificant decline in the TEER values after 12 h pi in cells  
211 infected with the Omicron variant and, by 36 h pi, barrier integrity was compromised by  
212 50% relative to mock-infected cells. However, infection with Delta variant led to drastic  
213 reduction of >80% in TEER values after 24 h pi suggesting rapid induction of cell death  
214 and disruption of epithelial barrier (Fig. 5A). We measured viral titers in the basolateral  
215 chamber and, surprisingly, the viral titers were comparable between the Omicron and  
216 Delta variant suggesting comparable transcytosis of both these variants but significantly  
217 higher cytopathic effect of the Delta variant as compared to the Omicron variant (Fig.  
218 5B). Disruption of cellular junctions was further confirmed by staining the cells with  
219 antibodies against SARS-CoV-2 N, occludin and  $\beta$ -catenin. As expected from the TEER  
220 values, infection with the Delta variant showed large syncytia formation as visualized by  
221 N-positive cells and disruption of and reduction in occludin and  $\beta$ -catenin staining (Fig.  
222 5C). Cells infected with the Omicron variant showed fewer infected cells, mild  
223 perturbation in junction proteins (Fig. 5C) further confirming the milder effect of this  
224 variant on epithelial barrier functions and pathogenicity as observed in animal studies by  
225 other groups([17](#), [29](#)).

226

### 227 **Comparable replication kinetics and neutralization of BA.1 and BA.2 sub-lineages**

228 Three sub-lineages of Omicron have been identified so far([8](#), [36](#)) and BA.1 and BA.2  
229 sub-lineages are the circulating virus strains in the third wave in India since November

230 2021 (Supplementary Fig. S2). We isolated both BA.1 and BA.2 sub-lineage viruses  
231 from patient samples and performed growth curve analysis of both these sub-lineages  
232 as described earlier in Calu-3 cells. We found no difference in the cellular viral RNA  
233 levels and viral titers in the supernatants at the indicated time-points post-infection (Fig.  
234 6A and 6B). To further verify the potential of antibodies from vaccinated individuals to  
235 neutralize both BA.1 and BA.2 lineages, we enrolled 15 subjects (Median age 29; 5  
236 Female, 10 Male) who were vaccinated with ChAdOx1 nCoV-19 vaccine in May 2021.  
237 We collected samples at three time points: i) first sample at one month after complete  
238 vaccination (June 2021), ii) a follow-up sample after 6 months (Dec 2021) and iii) a third  
239 sample during the ongoing third wave of SARS-CoV-2 infection (Feb 2022). We  
240 performed quantitative nucleocapsid (N) and RBD ELISA([13](#)) to monitor antibody levels  
241 in samples from the three bleeds. Six of the 15 samples had detectable levels of N  
242 antibodies (cut off: 15 BAU/mL) post-vaccination suggesting that these subjects had  
243 hybrid immunity (infection + vaccination) as the ChAdOx1 nCoV-19 vaccine does not  
244 generate N antibodies. The geometric mean titer (GMT) of N-ELISA antibodies reduced  
245 from 14.0 (95% CI: 8.4, 23.1) in June 2021 to 11.5 (95% CI: 7.9, 16.6) in Dec 2021 with  
246 only five positive samples. However, the samples collected during the Omicron surge in  
247 Feb 2022 showed a significant increase in N antibodies with a GMT of 53.5 (95% CI:  
248 19.6, 145.8) with ten positive samples (Fig. 6C). Similar trends were observed with RBD  
249 antibodies where we observed an approximate 3-fold in the GMT of RBD antibodies  
250 from 266.0 (95% CI: 120.2, 368.1) in June 2021 to 76.5 (95% CI: 36.7, 159.5) in Dec  
251 2021. The samples from Omicron wave showed a spike in RBD antibody titers to 935.3  
252 (95% CI: 440.4, 1986) (Fig. 6D).

253 To establish virus neutralization titer assays for the Omicron variant, we first  
254 performed conventional plaque assays with the virus stocks using both Calu-3 and Vero  
255 E6 cells and found delayed and small plaque formation in Calu-3 cells as compared to  
256 the Delta variant (Supplementary Fig. S3A). However, unlike the Delta variant, the  
257 Omicron variant did not produce plaques up to 48 h post-infection in Vero E6 cells. As  
258 Calu-3 cells are slow-growing and plaque assays are not amenable for high-throughput  
259 neutralization assays, we first tested the ability of the Omicron variant to form infectious  
260 foci by antibody staining with anti-spike and anti-nucleocapsid antibodies in Vero E6  
261 cells. While the Delta variant formed clear discernable infectious foci with both the  
262 antibodies, the same was less distinct with anti-spike antibodies for the Omicron variant  
263 although it was countable by the spot reader (Supplementary Fig. S3B). Staining with  
264 nucleocapsid antibodies produced better foci in the case of Omicron variant but the  
265 quality of foci was not comparable with the Delta variant (Supplementary Fig. S3B). We  
266 next tested secondary antibodies conjugated with fluorescent dye instead of  
267 horseradish peroxidase enzyme (HRP) and visualized the infectious foci in fluorescence  
268 mode. Use of fluorescence-based detection was far superior to HRP-based enzyme-  
269 substrate detection for the Omicron variant (Supplementary Fig. S3C). The assay  
270 showed consistency in performance as measured by the antibody titers of an in-house  
271 pooled convalescent reference serum (Supplementary Fig. S3D). We adopted this  
272 method for comparing the neutralizing antibody titers against the Delta and Omicron  
273 variants. The neutralizing antibody titers for Delta variant as measured by FRNT assay  
274 also showed about three-fold reduction from a GMT of 257.5 (95% CI: 145.8, 454.7) in  
275 June 2021 to 87.5 (49.7, 154.1) in Dec 2021 (Fig.6E). However, as expected from the

276 ELISA titers, the GMT of neutralizing antibodies increased significantly to 914.0 (95%  
277 CI: 468.7, 1782) in samples from the third wave in Feb 2022 indicating re-infection in  
278 most of these individuals. As shown by us and others([10](#), [37](#)), the neutralizing antibody  
279 titers for Omicron variant was drastically reduced at all the time points relative to that of  
280 Delta variant (Fig. 6F). Nine out of 15 samples had FRNT<sub>50</sub> value above the level of  
281 detection after vaccination in June 2021. The GMT of neutralizing antibodies for the  
282 Omicron variant was 26.9 (95% CI: 15.6, 46.4) in these samples. The number of  
283 samples positive for Omicron antibodies reduced to six out of 15 bringing the down the  
284 GMT of neutralizing antibodies to 18.3 (95% CI: 11.6, 28.7) by Dec 2021. As expected,  
285 the surge in Omicron infections in the study area was reflected in the GMT of  
286 neutralizing antibodies in samples from Feb 2022 (Fig. 6F). Surprisingly, the samples  
287 from Omicron surge showed relatively lower titer, a GMT of 261.9 (95% CI: 113.0,  
288 607.5) as compared to a GMT of 914.0 (95% CI: 468.7, 1782) for the Delta variant  
289 suggesting that natural infection with Omicron variant generates significantly higher  
290 levels of antibodies to the Delta variant.

291 SARS-CoV-2 sequencing data from the National Capital Region (NCR), our  
292 study site, showed co-occurrence of B.1.617.2 (Delta) and various AY.\* (Delta plus)  
293 lineages during the months of September 2021 to December 2021, wherein all AY  
294 lineages were more in circulation than the parent B.1.617.2 lineage (Supplementary  
295 Figure S2). It is important to note that a rise in the cases of Omicron lineages (B.1.529,  
296 BA.1 and BA.2) is observed from December 2021 onwards. This is concomitant with the  
297 arrival of Omicron variant in India and a gradual decrease in circulation of Delta lineage.  
298 Delta variant was superseded by Omicron by January 2022. Within Omicron lineages,

299 cases of BA.2 sub-lineage increased/spread at a faster rate compared to other Omicron  
300 lineages (BA.1 and B.1.529) (Supplementary Figure S2) which is similar to reports from  
301 other countries. This is consistent with the observations that BA.2 lineage has increased  
302 rates of transmission ([38](#), [39](#)). We enrolled participants (n=19) who were either COVID-  
303 19 RT-PCR positive in the ongoing Omicron surge or had symptomatic respiratory  
304 infection but got no COVID-19 testing done. The GMT of neutralizing antibodies for  
305 BA.1 and BA.2 sub-lineages in these samples were 538.1 (95% CI: 338.5, 855.3) and  
306 910.6 (95% CI: 608.2, 1363) and this difference was not statistically significant as  
307 reported by others([40](#)). As we recently reported minimal to no neutralizing antibodies  
308 against the Omicron variant in subjects with vaccine-induced or hybrid immunity at the  
309 beginning of the surge in COVID-19 cases in December 2021([12](#)), our data suggests  
310 that enhanced neutralizing antibody titers observed in this study cohort is due to natural  
311 exposure to SARS-CoV-2 Omicron variant.

312

### 313 **Copper and Iron (II) salts inhibit both Delta and Omicron variant infection**

314 Divalent cations play an important role in replication of RNA viruses([41](#)) and previous  
315 reports have suggested inhibition of coronavirus replication by Zn salts([42](#)). We  
316 established the fluorescence-based SARS-CoV-2 RNA-dependent RNA polymerase  
317 (RdRp) assay using purified nsp7, nsp8 and nsp12 proteins with minor modifications  
318 based on previous reports([43-45](#)). RdRp assays were performed in the presence of 10  
319  $\mu\text{M}$ , 100  $\mu\text{M}$  or 1000  $\mu\text{M}$  of  $\text{CaCl}_2/\text{CuCl}_2/\text{FeSO}_4/\text{ZnSO}_4$ .  $\text{CaCl}_2$  did not affect RdRp  
320 activity under these conditions. At 1000  $\mu\text{M}$ ,  $\text{CuCl}_2$  showed about 35% reduction in  
321 RdRp activity while  $\text{FeSO}_4$  and  $\text{ZnSO}_4$  showed 85% and 60% inhibition respectively at

322 the same concentration (Fig. 7A). At 100  $\mu\text{M}$ ,  $\text{FeSO}_4$  showed 25% reduction in activity  
323 which was significant compared to untreated while  $\text{ZnSO}_4$  showed 52% inhibition at this  
324 concentration (Fig. 7A). Only  $\text{ZnSO}_4$  was capable of inhibiting SARS-CoV-2 RdRp  
325 activity albeit by only 22% at 10  $\mu\text{M}$  (Fig. 7A). The 50% inhibitory concentration ( $\text{IC}_{50}$ ) of  
326  $\text{ZnSO}_4$  and  $\text{FeSO}_4$  in RdRp assays was 313  $\mu\text{M}$  and 347  $\mu\text{M}$  respectively (Fig. 7B and  
327 7C). To further confirm the validity of these *in vitro* inhibition in cell culture, we infected  
328 Calu-3 cells with either the Delta variant or the Omicron variant and medium  
329 supplemented with 50  $\mu\text{M}$  each of  $\text{CaCl}_2/\text{CuCl}_2/\text{FeSO}_4/\text{MnCl}_2/\text{ZnSO}_4$  was added after  
330 virus adsorption and cells were cultured for 24 h. This concentration of salts was shown  
331 to not affect viability of the cells (Supplementary Figure S4). Virus titers in the infected  
332 culture supernatants were estimated by plaque assays. Contrary to RdRp assay results,  
333  $\text{ZnSO}_4$  at 50  $\mu\text{M}$  concentrations failed to show any inhibition of either the Delta or the  
334 Omicron variants in Calu-3 cells (Fig. 7D and 7E). Similarly, neither  $\text{CaCl}_2$  nor  $\text{MnCl}_2$   
335 had any impact on virus titers. However, both  $\text{CuCl}_2$  and  $\text{FeSO}_4$  showed significant  
336 inhibition of virus titers. Both these salts inhibited the Delta variant infection by 70%  
337 (Fig. 7D) and the effect was even more drastic (>90% inhibition) in the case of Omicron  
338 variant (Fig. 7E). Therefore, our results suggest that copper and iron salts may have  
339 both direct and indirect antiviral activity against SARS-CoV-2 when added post-  
340 infection.

341

## 342 **DISCUSSION**

343 SARS-CoV-2 Delta variant was shown to be more infectious and duration from PCR  
344 positivity or symptoms with this variant was shorter as compared to other SARS-CoV-2



345 virus strains leading to faster transmission and severe disease. In our study, the Delta  
346 variant showed enhanced disruption of epithelial barriers and junction proteins  
347 suggesting that the enhanced cytopathic effect and syncytia formation combined with  
348 the ability to escape from neutralizing antibodies has provided a growth advantage for  
349 Delta variant([1](#), [2](#), [28](#)). Contrary to the enhanced pathogenicity of the Delta variant, the  
350 Omicron variant showed lower replication and had milder effect on epithelial barrier  
351 functions which correlates with less number of severe cases, hospitalization and lower  
352 number of deaths due to COVID-19 in the ongoing third wave of SARS-CoV-2 infections  
353 in India which is similar to what has been reported from other countries([46](#)). The clinical  
354 samples for this study was collected during the second and third wave of COVID-19 in  
355 India during which the Delta and Omicron variants were the predominant circulating  
356 virus strains. Cohort data of patients with mild COVID-19 infection has shown that RBD  
357 antibodies decay with a half-life of 69 days([47](#)). We observed a three-fold reduction in  
358 RBD antibody and neutralizing antibody titers after six months. However, most of the  
359 samples had no neutralizing antibodies against the Omicron variant after six months of  
360 vaccination suggesting that waning neutralizing titers are an important determinant of  
361 reinfections and may also contribute to increased susceptibility to new variants of  
362 concern that escape pre-existing humoral immunity. The high-throughput neutralizing  
363 antibody assay we established in this study enabled us to circumvent the challenges of  
364 estimating neutralizing antibody titers for the Omicron variant as it grew poorly and did  
365 not form distinct plaques or infectious foci like the Delta variant. Currently, BA.1 and  
366 BA.2 sub-lineages of the Omicron variant are circulating in India and reports have  
367 raised concern about the enhanced pathogenicity or transmissibility of BA.2 sub-lineage



368 due to unique mutations in the spike region(39, 48). We show that both BA.1 and BA.2  
369 sub-lineages of Omicron variant have comparable replication kinetics in Calu-3 cells.  
370 Our sequencing data suggests that the BA.2 sub-lineage of the Omicron variant was the  
371 predominant circulating virus at the time of the study and relatively higher levels of  
372 neutralizing antibodies to BA.2 was observed in study participants as compared to BA.1  
373 further confirming that BA.2 may have been the infecting virus. We show that  
374 participants who were naturally infected with the Omicron variant generated neutralizing  
375 antibodies against both BA.1 and BA.2 sub-lineages indicating that exposure to any of  
376 the sub-lineages of Omicron would confer cross-protection against other members of  
377 the sub-lineage in agreement with other reports(14, 40). Interestingly, higher titers of  
378 neutralizing antibodies were observed against the Delta variant which was no longer in  
379 circulation indicating a broader cross-protective immune response most likely due to  
380 conserved B-cell and T-cell epitopes in the Omicron variant that could have triggered  
381 the memory responses in people with hybrid immunity(49, 50). Thus, natural infection  
382 with Omicron variant may have acted as a booster eliciting cross-reacting antibodies  
383 across Omicron sub-lineages and other VoCs in young adults.

384

385 Several studies have reported that interferons expressed in the lower respiratory tract  
386 contribute to tissue damage, impair regeneration of lung epithelium and contribute to  
387 morbidity observed in COVID-19 patients(51, 52). We observed similar levels of  
388 induction of *IFN-β* and *IFN-λ1* and the downstream effectors namely *ISG15* and *OAS1*  
389 in cells infected with the Delta variant and with the ancestral B.6 lineage virus  
390 suggesting that suppression of innate immune responses is not a contributory factor in

391 increased pathogenesis observed with the Delta variant. Despite lower levels of  
392 infection, the Omicron variant induced higher levels of interferon pathway genes. Since  
393 the Omicron variant was shown to mostly replicate in the upper respiratory tract([53](#), [54](#)),  
394 this suggests that interferon-dependent antiviral responses may limit viral replication  
395 and further tissue spread thus resulting in milder symptoms and resolution of infection.  
396 Therefore, interferon therapy targeted towards the upper respiratory tract may be more  
397 effective in the case of infection with the Omicron variant. In addition to interferons, our  
398 results suggest that supplementation with copper and iron salts may also augment the  
399 antiviral strategy for SARS-CoV-2 as both  $\text{CuCl}_2$  and  $\text{FeSO}_4$  inhibited both the Delta and  
400 Omicron variants in Calu-3 cells.

401  
402 Vaccines have played a major role in bringing the COVID-19 pandemic under control.  
403 However frequent emergence of SARS-CoV-2 variants requires adjunct approaches to  
404 deal with infections. Micronutrient supplementation could be an effective and safe  
405 strategy. Ferric ammonium citrate (FAC) was shown to inhibit a number of RNA viruses  
406 including Influenza A virus, Zika virus and Hepatitis C virus in both cell culture and  
407 animal models and it was shown that treatment with FAC perturbed endosomal release  
408 of the internalized virus in the case of Influenza A virus([55](#)). SARS-CoV-2 nsp12 has  
409 been shown to bind Fe and Iron-Sulfur cluster binding was required for optimal activity  
410 of the RdRp([56](#)). However, there have been no direct demonstration of the effect of Fe  
411 salts on either the RdRp activity in vitro on in lung epithelial cells. We show here that  
412  $\text{FeSO}_4$  inhibited both RdRp activity and infection in Calu-3 cells. The inhibitory  
413 concentration in cell culture was much below the *in vitro*  $\text{IC}_{50}$  concentrations. Contrary to

414 our findings, iron overload is considered as a risk factor for severe COVID-19 disease  
415 and iron chelation has been proposed as a treatment option(57) (58). Therefore, the  
416 exact mechanism of action behind inhibition of SARS-CoV-2 infection by FeSO<sub>4</sub>  
417 warrants further investigation. Interestingly, CuCl<sub>2</sub> which inhibited RdRp activity at 1 mM  
418 also inhibited virus infection in Calu-3 cells at 20 times below this concentration  
419 indicating that both Fe and Cu ions may act on SARS-CoV-2 both directly and via host  
420 pathways. Previous reports have shown that copper-coated surfaces can inactivate  
421 SARS-CoV-2(59) and other enveloped and non-enveloped viruses are susceptible to  
422 copper ions either due to direct effect of copper ions on viral particles or viral genome or  
423 due to induction of reactive oxygen species. Therefore, copper supplementation during  
424 viremic phase may further augment antiviral strategies for COVID-19(60-62). Zinc  
425 acetate, in combination with zinc ionophore pyrithione, was shown to inhibit SARS-CoV-  
426 1 infection in Vero E6 cells and zinc ions was shown to directly inhibit RdRp activity of  
427 SARS-CoV-1(42). SARS-CoV-2 proteome encodes for a number of metalloproteins  
428 including zinc-binding proteins such as nsp2, nsp9, nsp10/16 complex, nsp12 and  
429 proofreading exoribonuclease nsp14 (Please see Uniprot ID: P0DTD1 · R1AB\_SARS2).  
430 Some of the critical aspects of viral replication such as RdRp activity, 2'-O methylation,  
431 capping depends on intracellular zinc(63, 64). Zinc ejection from some of these enzymes  
432 has been proposed as an attractive antiviral target(65). However, despite ZnSO<sub>4</sub>  
433 inhibiting the activity of SARS-CoV-2 RdRp *in vitro*, we saw no effect on SARS-CoV-2  
434 Delta and Omicron variants at 50 μM concentration. Whether higher concentrations of  
435 zinc salts are required to achieve significant inhibition of these variants in cell culture  
436 needs further investigation.

437

## 438 **ONLINE METHODS**

### 439 **Human Ethics**

440 The study was approved by the Institutional Ethics Committee for human research at  
441 ESIC Hospital and Medical College (No.134/R/10/IEC/22/2021/02) and THSTI (THS  
442 1.8.1/ (93)). Informed consent was obtained from all the participants.

443

### 444 **Human Samples**

445 ChAdOx1 nCoV-19 cohort: Subjects (age 25-46) visiting ESIC Medical College &  
446 Hospital, Faridabad for vaccination were enrolled in the study after obtaining written  
447 informed consent. About 4 ml of whole blood was collected for serum preparation four  
448 weeks after the first and second dose of vaccination and a follow-up sample was  
449 collected after six months. Nasopharyngeal/Oropharyngeal (NP/OP) swabs were  
450 collected from patients with symptoms of COVID-19 infection. Total RNA was isolated to  
451 detect SARS-CoV-2 using COVIDsure multiplex real-time RT-PCR kit (Triviron  
452 Healthcare) either at Employees State Insurance Corporation (ESIC) Medical College &  
453 Hospital or at the bioassay laboratory Translational Health Science and Technology  
454 Institute, Faridabad. Clinical presentations were mild to moderate fever, dry cough, and  
455 loss of sense of smell and taste. All COVID-19 positive patients were self-isolated and  
456 recovered without any need for clinical intervention or hospitalization. A follow-up blood  
457 sample was collected after 3-4 weeks post-recovery in both second (May 2021) and  
458 third wave (Feb 2022).

459

## 460 **Cells and Viruses**

461 Calu-3 cells and Vero E6 cells were procured from American Type Culture Collection  
462 (ATCC) and European Collection of Authenticated Cell Cultures (ECACC) respectively.  
463 Both cell lines were maintained in Dulbecco's Modified Eagle Medium (DMEM)  
464 (HiMedia) supplemented with 10% fetal bovine serum (FBS), 100 units/ml of Penicillin-  
465 Streptomycin-Glutamine (PSG), and 1X non-essential amino acid (NEAA). In addition to  
466 this, 25 mM HEPES was added to the Vero E6 culture medium. Different variants of  
467 SARS-CoV-2 i.e., ancestral (B.6, Genbank: MW422884.1), kappa (B.1.617.1, Genbank:  
468 MZ356902.1), delta (B.1.617.2, Genbank: MZ356566.1), and omicron (B.1.529; BA.1  
469 GISAID: EPI\_ISL\_6716902 and BA.2 GISAID ID: EPI\_ISL\_87638432 sub-lineages)  
470 were propagated in Calu-3 cells and passaging was limited to five passages.

471

## 472 **Growth curve experiment**

473 All experiments with infectious SARS-CoV-2 virus were performed at the infectious  
474 disease research facility, which is a biosafety level-3 laboratory. Calu-3 cells were  
475 seeded in 48-well or 24-well plates and infected with indicated SARS-CoV-2 virus  
476 isolates two days post-seeding. Infected culture supernatants were collected at  
477 indicated time points to estimate viral titers by plaque assay on Vero E6 cells. Total  
478 RNA was extracted from cells collected at respective time points and viral copy  
479 numbers (N gene) were estimated by quantitative RT-PCR using RNase P gene for  
480 normalization as described previously([66](#)).

481

## 482 **Plaque assay Method**

483 Vero E6 cells were used for virus titration by plaque assay method. The supernatants  
484 were collected from infected cells at indicated time points. The supernatants were ten-  
485 fold diluted using growth medium with 2% FBS. After 1h of viral adsorption, virus  
486 inoculum was removed. Overlay medium with 0.5% carboxymethylcellulose (CMC) was  
487 added to the cells. The plates were incubated at 37° C for 48 h for all SARS-CoV-2  
488 variants except omicron where the incubation period was 72 h. After the incubation  
489 period, cells were fixed with 3.7% formaldehyde solution followed by incubation for 10  
490 min at room temperature (RT). Cells were stained with crystal violet solution and  
491 plaques were observed.

492

#### 493 **Trans-epithelial electrical resistance (TEER) and confocal microscopy**

494 Calu-3 cells were seeded at 30,000 on 3 µm pore size transwell inserts (Corning - 3415)  
495 and grown for 21 days. TEER was monitored on alternate days using a chopstick  
496 electrode (Millipore) and the medium was changed on the same day. On day 22 post-  
497 seeding, cells were infected with indicated variants of SARS-CoV-2 at 0.3 MOI. After 1 h  
498 of viral adsorption, virus inoculum was removed and cells were washed twice with 1X  
499 PBS. Growth medium with 10% FBS was added to the cells. TEER was monitored at  
500 indicated time points. At 48 h pi, culture inserts were washed with cold 1X PBS and  
501 incubated with cold methanol at -20°C for 20 minutes. Cells were further incubated with  
502 IMF buffer (20 mM HEPES, pH 7.5, 0.1% Triton X-100, 150 mM sodium chloride, 5 mM  
503 EDTA and 0.02% sodium azide as a preservative) for 5 min at room temperature (RT)  
504 and all further washes were performed with IMF buffer. Non-specific antibody binding  
505 sites were blocked by incubating cells with IMF buffer containing 2% normal goat serum

506 for 10 min at RT. Membranes were cut out using a scalpel blade and transferred to a  
507 48-well plate. Cells were washed three times followed by incubation with antibodies  
508 against SARS-CoV-2 nucleocapsid, occludin, and  $\beta$ -catenin in IMF buffer for 1 h at RT.  
509 Cells were washed followed by incubation with secondary antibodies tagged with Alexa  
510 Fluor 488/568/633 (Molecular probes) for 30 min at RT by avoiding exposure to light.  
511 Cells were washed with IMF buffer three times and stained with DAPI at 1:10,000  
512 dilution for 10 min. Cells were washed with PBS, mounted on glass slide using antifade  
513 solution (Molecular probes), and images were captured at 100X magnification using  
514 FV3000 confocal microscope (Olympus). Acquired images were processed using  
515 CellSens software (Olympus) and projections of Z-stack (maximum intensity) are shown  
516 in figures.

517

### 518 **Focus-forming units (FFU) assay**

519 The supernatants were collected from infected cells at indicated time points. The  
520 supernatants were ten-fold diluted using growth medium with 2% FBS. After 1h of viral  
521 adsorption, virus inoculum was removed. Overlay medium with 1.5%  
522 carboxymethylcellulose (CMC) for all SARS-CoV-2 variants except for Omicron where  
523 1% CMC was used. The plates were incubated at 37° C for 28 h for omicron and 24 h  
524 for all other SARS-CoV-2 variants. After incubation time, cells were fixed with  
525 formaldehyde solution followed by permeabilization with IMF buffer for 20 min  
526 incubation. Further, cells were stained with anti-spike RBD rabbit polyclonal antibody  
527 dilution at a dilution of 1:2000 for 1 h, followed by incubation with secondary antibody  
528 i.e., Alexa flour 488-conjugated anti-rabbit antibody at 1:500 dilution for 1 h. For omicron

529 isolate, anti-nucleocapsid primary antibody was used at a dilution of 1:2000. This was  
530 followed by incubation with secondary antibody i.e., Alexa flour 488-conjugated goat  
531 anti-mouse IgG secondary antibody at 1:500 dilution. Fluorescent foci indicating  
532 infected cells were observed and counted using AIDiSpot reader using FITC channel.

533

#### 534 **Western blot**

535 At indicated time points, cells were washed twice with cold PBS on ice and were  
536 collected in 200  $\mu$ l of 1X laemmli buffer with protease inhibitor mix and 1 mM PMSF.  
537 Lysates were incubated on ice for 10 min and sonicated (amplitude: 30%, time: 5 sec  
538 ON/10 sec OFF, total cycles: 10) on ice. Cell lysates were centrifuged at 13,000 x g for  
539 15 min at 4 °C. 5  $\mu$ l of each sample was resolved on 12% SDS-PAGE. Gels were  
540 transferred onto PVDF membrane for 2 h and the SARS-CoV-2 infection was analyzed  
541 by probing the blot with the SARS-CoV-2 nucleocapsid antibody. GAPDH antibody was  
542 used as a loading control. Primary antibody incubation was followed by HRP-conjugated  
543 secondary antibodies. Luminol-based chemiluminescent substrate was added to the  
544 blots and signals were detected using a gel documentation system (Azure biosystems  
545 C400).

546

#### 547 **Virus entry experiment**

548 Calu-3 cells were infected with the above-indicated variants of SARS-CoV-2 at 5 MOI.  
549 After 1 h of viral adsorption, the virus inoculum was removed and cells were washed  
550 with 1X PBS. Cells were trypsinized and collected in complete growth medium and  
551 centrifuged at 200 x g for 5 min. The supernatants were discarded and the cell pellets



552 were washed twice with 1X PBS followed by centrifugation. In the final step, the cell  
553 pellets were collected in 350  $\mu$ l lysis buffer. Viral copy numbers were estimated as  
554 described in the above section.

555

### 556 **Quantitative RT-PCR Assay**

557 Calu-3 cells were infected with ancestral, delta, and omicron variants of SARS-CoV-2 at  
558 a MOI of 0.3. At indicated time points, the supernatant was collected for estimating viral  
559 titres by plaque assay, and cells were collected in lysis buffer provided in the RNA  
560 isolation kit as described in the above section. For interferon pathway, 500 ng RNA was  
561 used to erase genomic DNA and reverse transcribed using PrimeScript RT reagent kit  
562 with gDNA eraser kit. The indicated genes were quantitated by SYBR green chemistry  
563 and GAPDH was used as housekeeping control gene for normalization. The list of  
564 primers used is provided in the key resources table. Data were analyzed using the  
565  $\Delta\Delta C_T$  method, where  $C_T$  is cycle threshold.

566

### 567 **TEER in air-liquid interface condition and confocal microscopy**

568 Calu-3 cells were seeded at a density of 30,000 cells in 3  $\mu$ m pore size polycarbonate  
569 membranes in 24 well-plate with corresponding 200  $\mu$ l culture medium on the apical  
570 side and 800  $\mu$ l culture medium was added into the basolateral chamber. Cells were left  
571 to grow submerged for 8 days. The culture medium was changed on alternate days and  
572 TEER values were monitored. On day 9, the medium was removed from the apical  
573 chamber to obtain air-liquid interface (ALI) conditions. Cells were cultured in ALI  
574 conditions for 20 days. After obtaining stable TEER values, on day 21, cells were

575 washed with 1X Hanks' balanced salt solution (HBSS). Cells were infected with either  
576 the Delta or the Omicron variants of SARS-CoV2 at 0.3 MOI. After 1 h of viral  
577 adsorption, cells were washed twice with HBSS, and culture medium was added to the  
578 basolateral side. To assess the effect of SARS-CoV-2 on epithelial cells barrier, TEER  
579 was monitored at indicated time points. Supernatants were collected from basolateral  
580 surface for measuring viral titres. At 36 h pi, cells were washed with cold PBS and fixed  
581 in ice-cold methanol for 20 min at  $-20^{\circ}\text{C}$ . The cells were stained against junction  
582 proteins along with nucleocapsid antibodies as described above in the confocal  
583 microscopy section.

584

#### 585 **Quantitative Nucleoprotein (N) and RBD ELISA**

586 ELISA for nucleocapsid (N) and recombinant spike protein receptor-binding domain  
587 (RBD) was performed as described earlier. Detailed method description is provided in  
588 previous reports([13](#), [67](#)).

589

#### 590 **Virus microneutralization assay**

591 Virus microneutralization assay by focus reduction neutralization titer (FRNT) assay  
592 using indicating virus isolates was performed as described earlier([13](#), [67](#)).

593

#### 594 **RNA-dependent RNA polymerase (RdRp) activity assay**

595 The Quant-iT™ PicoGreen® dsDNA reagent was used to establish a fluorophore-based  
596 RdRp activity system. Adenosine 5'-triphosphate (ATP) was purchased from Sigma–  
597 Aldrich. RdRp RNA template with self-hairpin primer used for RdRp assays in this study



621 Data were analysed and charts were prepared using GraphPad Prism software. All  
622 experiments were performed with two or more replicates and graphs have been  
623 prepared representing data from at least two independent experiments. Figure legends  
624 indicate error bars and statistical tests conducted for estimating P values.

625

### 626 **Data availability**

627 All the data are presented in this manuscript. Source data will be made available upon  
628 request.

629

### 630 **ACKNOWLEDGEMENTS**

631 We thank all the members of bioassay lab, COVID-19 testing team, Amresh Kumar  
632 Singh Maniram and other members of the Clinical and Cellular Virology lab for technical  
633 support. We thank Neha Garg and Shamsheer Singh for data management. We thank all  
634 the patients who consented to participate in the study.

635

### 636 **AUTHOR CONTRIBUTIONS**

637 JS, AP, AA, MB, PK and KP performed all cell culture and infection experiments. CR  
638 purified recombinant proteins and performed the *in vitro* RdRp assays. PC, PD, RM, PM  
639 performed SARS-CoV-2 genome sequencing and analysis. AKP supervised and  
640 coordinated the study at the clinical site and contributed reagents. RP designed the  
641 sequencing experiments, supervised the team and analyzed the data. GRM conceived  
642 the study, designed the experiments, and analyzed the data. JS, AP, AA and GRM

643 wrote the manuscript. All authors have reviewed and approved the final version of the  
644 manuscript.

645

## 646 **FUNDING INFORMATION**

647 This work was supported by the Department of Biotechnology (DBT) grants through  
648 IndCEPI Mission (BT/MB/CEPI/2016), Translational Research Program  
649 (BT/PR30159/MED/15/188/2018) and BT/PR40384/COT/142/5/2020. Funding support  
650 was also obtained from Global Immunology and Immune Sequencing for Epidemic  
651 Response (INV-030592). RP acknowledges funding support from IUSSTF (CLP-0033)  
652 and BMGF (CLP-0036). The funders had no role in study design, data collection and  
653 interpretation or the decision to submit the work for publication.

654

## 655 **CONFLICT OF INTEREST STATEMENT**

656 The authors have declared that no conflict of interest exists.

657

## 658 **REFERENCES**

- 659 1. Campbell F, Archer B, Laurenson-Schafer H, Jinnai Y, Konings F, Batra N, et al.  
660 Increased transmissibility and global spread of SARS-CoV-2 variants of concern as at  
661 June 2021. *Euro Surveill.* 2021 Jun;26(24). PubMed PMID: 34142653. Pubmed Central  
662 PMCID: PMC8212592. Epub 2021/06/19.
- 663 2. Fisman DN, Tuite AR. Progressive Increase in Virulence of Novel SARS-CoV-2  
664 Variants in Ontario, Canada. *medRxiv.* 2021:2021.07.05.21260050.
- 665 3. Li B, Deng A, Li K, Hu Y, Li Z, Xiong Q, et al. Viral infection and transmission in a  
666 large well-traced outbreak caused by the Delta SARS-CoV-2 variant. *medRxiv.*  
667 2021:2021.07.07.21260122.
- 668 4. Mlcochova P, Kemp S, Dhar MS, Papa G, Meng B, Mishra S, et al. SARS-CoV-2  
669 B.1.617.2 Delta variant emergence, replication and sensitivity to neutralising antibodies.  
670 *bioRxiv.* 2021:2021.05.08.443253.

- 671 5. Bernal JL, Andrews N, Gower C, Gallagher E, Simmons R, Thelwall S, et al.  
672 Effectiveness of COVID-19 vaccines against the B.1.617.2 variant. medRxiv.  
673 2021:2021.05.22.21257658.
- 674 6. Planas D, Veyer D, Baidaliuk A, Staropoli I, Guivel-Benhassine F, Rajah MM, et  
675 al. Reduced sensitivity of infectious SARS-CoV-2 variant B.1.617.2 to monoclonal  
676 antibodies and sera from convalescent and vaccinated individuals. bioRxiv.  
677 2021:2021.05.26.445838.
- 678 7. Supasa P, Zhou D, Dejnirattisai W, Liu C, Mentzer AJ, Ginn HM, et al. Reduced  
679 neutralization of SARS-CoV-2 B.1.1.7 variant by convalescent and vaccine sera. Cell.  
680 2021 Apr 15;184(8):2201-11 e7. PubMed PMID: 33743891. Pubmed Central PMCID:  
681 PMC7891044. Epub 2021/03/22.
- 682 8. Mahase E. Covid-19: What do we know about omicron sublineages? BMJ. 2022  
683 Feb 11;376:o358. PubMed PMID: 35149516. Epub 20220211.
- 684 9. Cele S, Jackson L, Khan K, Khoury DS, Moyo-Gwete T, Tegally H, et al. SARS-  
685 CoV-2 Omicron has extensive but incomplete escape of Pfizer BNT162b2 elicited  
686 neutralization and requires ACE2 for infection. medRxiv. 2021 Dec 11. PubMed PMID:  
687 34909788. Pubmed Central PMCID: PMC8669855. Epub 20211211.
- 688 10. Dejnirattisai W, Shaw RH, Supasa P, Liu C, Stuart AS, Pollard AJ, et al. Reduced  
689 neutralisation of SARS-CoV-2 omicron B.1.1.529 variant by post-immunisation serum.  
690 Lancet. 2021 Dec 20. PubMed PMID: 34942101. Pubmed Central PMCID:  
691 PMC8687667. Epub 20211220.
- 692 11. Iketani S, Liu L, Guo Y, Liu L, Huang Y, Wang M, et al. Antibody Evasion  
693 Properties of SARS-CoV-2 Omicron Sublineages. bioRxiv. 2022:2022.02.07.479306.
- 694 12. Medigeshi GR, Batra G, Murugesan DR, Thiruvengadam R, Chattopadhyay S,  
695 Das B, et al. Sub-optimal neutralisation of omicron (B.1.1.529) variant by antibodies  
696 induced by vaccine alone or SARS-CoV-2 Infection plus vaccine (hybrid immunity) post  
697 6-months. eBioMedicine. 2022;78.
- 698 13. Singh J, Shaman H, Anantharaj A, Singh B, Pargai K, Kumar P, et al. Infection  
699 with Omicron variant generates neutralizing antibodies to BA.1 and BA.2 sub-lineages  
700 and induces higher levels of cross-neutralizing antibodies to Delta variant. medRxiv.  
701 2022:2022.01.28.22269990.
- 702 14. Yu J, Collier AY, Rowe M, Mardas F, Ventura JD, Wan H, et al. Neutralization of  
703 the SARS-CoV-2 Omicron BA.1 and BA.2 Variants. N Engl J Med. 2022 Mar 16.  
704 PubMed PMID: 35294809. Epub 20220316.
- 705 15. Carroll T, Fox D, van Doremalen N, Ball E, Morris MK, Sotomayor-Gonzalez A, et  
706 al. The B.1.427/1.429 (epsilon) SARS-CoV-2 variants are more virulent than ancestral  
707 B.1 (614G) in Syrian hamsters. PLoS Pathog. 2022 Feb;18(2):e1009914. PubMed  
708 PMID: 35143587. Pubmed Central PMCID: PMC8865701. Epub 20220210.
- 709 16. Escalera A, Gonzalez-Reiche AS, Aslam S, Mena I, Laporte M, Pearl RL, et al.  
710 Mutations in SARS-CoV-2 variants of concern link to increased spike cleavage and  
711 virus transmission. Cell Host Microbe. 2022 Mar 9;30(3):373-87 e7. PubMed PMID:  
712 35150638. Pubmed Central PMCID: PMC8776496. Epub 20220121.
- 713 17. Halfmann PJ, Iida S, Iwatsuki-Horimoto K, Maemura T, Kiso M, Scheaffer SM, et  
714 al. SARS-CoV-2 Omicron virus causes attenuated disease in mice and hamsters.  
715 Nature. 2022 Mar;603(7902):687-92. PubMed PMID: 35062015. Epub 20220121.

- 716 18. Port JR, Yinda CK, Avanzato VA, Schulz JE, Holbrook MG, van Doremalen N, et  
717 al. Increased small particle aerosol transmission of B.1.1.7 compared with SARS-CoV-2  
718 lineage A in vivo. *Nat Microbiol.* 2022 Feb;7(2):213-23. PubMed PMID: 35017676. Epub  
719 20220111.
- 720 19. Saito A, Irie T, Suzuki R, Maemura T, Nasser H, Uriu K, et al. Enhanced  
721 fusogenicity and pathogenicity of SARS-CoV-2 Delta P681R mutation. *Nature.* 2022  
722 Feb;602(7896):300-6. PubMed PMID: 34823256. Pubmed Central PMCID:  
723 PMC8828475. Epub 20211125.
- 724 20. Ulrich L, Halwe NJ, Taddeo A, Ebert N, Schon J, Devisme C, et al. Enhanced  
725 fitness of SARS-CoV-2 variant of concern Alpha but not Beta. *Nature.* 2022  
726 Feb;602(7896):307-13. PubMed PMID: 34937050. Pubmed Central PMCID:  
727 PMC8828469. Epub 20211222.
- 728 21. Laskar R, Ali S. Phylo-geo-network and haplogroup analysis of 611 novel  
729 coronavirus (SARS-CoV-2) genomes from India. *Life Sci Alliance.* 2021 May;4(5).  
730 PubMed PMID: 33727249. Pubmed Central PMCID: PMC7994317. Epub 2021/03/18.
- 731 22. Pattabiraman C, Habib F, P KH, Rasheed R, Prasad P, Reddy V, et al. Genomic  
732 epidemiology reveals multiple introductions and spread of SARS-CoV-2 in the Indian  
733 state of Karnataka. *PLoS One.* 2020;15(12):e0243412. PubMed PMID: 33332472.  
734 Pubmed Central PMCID: PMC7746284 participate as a volunteer in this study and his  
735 employer neither had access to data, nor any say in the design of the study or the  
736 decision to publish. This does not alter our adherence to PLOS ONE policies on sharing  
737 data and materials. All other authors are employees of state (PD, PK) or central  
738 government. The employers had no role in the design of the study or the decision to  
739 publish. The authors declare that they do not have any other financial or non-financial  
740 relationships that could present a conflict of interest. Epub 2020/12/18.
- 741 23. Anantharaj A, Gujjar S, Kumar S, Verma N, Wangchuk J, Khan NA, et al.  
742 Kinetics of viral load, immunological mediators and characterization of a SARS-CoV-2  
743 isolate in mild COVID-19 patients during acute phase of infection. *medRxiv.*  
744 2020:2020.11.05.20226621.
- 745 24. Dhar MS, Marwal R, Radhakrishnan V, Ponnusamy K, Jolly B, Bhoyar RC, et al.  
746 Genomic characterization and Epidemiology of an emerging SARS-CoV-2 variant in  
747 Delhi, India. *medRxiv.* 2021:2021.06.02.21258076.
- 748 25. Zhu N, Wang W, Liu Z, Liang C, Wang W, Ye F, et al. Morphogenesis and  
749 cytopathic effect of SARS-CoV-2 infection in human airway epithelial cells. *Nat*  
750 *Commun.* 2020 Aug 6;11(1):3910. PubMed PMID: 32764693. Pubmed Central PMCID:  
751 PMC7413383. Epub 2020/08/09.
- 752 26. Liu Y, Liu J, Johnson BA, Xia H, Ku Z, Schindewolf C, et al. Delta spike P681R  
753 mutation enhances SARS-CoV-2 fitness over Alpha variant. *bioRxiv.* 2021 Sep 5.  
754 PubMed PMID: 34462752. Pubmed Central PMCID: PMC8404900. Epub 20210905.
- 755 27. Mlcochova P, Kemp S, Dhar MS, Papa G, Meng B, Ferreira I, et al. SARS-CoV-2  
756 B.1.617.2 Delta variant replication and immune evasion. *Nature.* 2021 Sep 6. PubMed  
757 PMID: 34488225. Epub 2021/09/07.
- 758 28. Li B, Deng A, Li K, Hu Y, Li Z, Xiong Q, et al. Viral infection and transmission in a  
759 large, well-traced outbreak caused by the SARS-CoV-2 Delta variant. *medRxiv.*  
760 2021:2021.07.07.21260122.



- 761 29. Suzuki R, Yamasoba D, Kimura I, Wang L, Kishimoto M, Ito J, et al. Attenuated  
762 fusogenicity and pathogenicity of SARS-CoV-2 Omicron variant. *Nature*. 2022  
763 Mar;603(7902):700-5. PubMed PMID: 35104835. Epub 20220201.
- 764 30. Bojkova D, Widera M, Ciesek S, Wass MN, Michaelis M, Cinatl J, Jr. Reduced  
765 interferon antagonism but similar drug sensitivity in Omicron variant compared to Delta  
766 variant of SARS-CoV-2 isolates. *Cell Res*. 2022 Mar;32(3):319-21. PubMed PMID:  
767 35064226. Pubmed Central PMCID: PMC8781709. Epub 20220121.
- 768 31. Zhao H, Lu L, Peng Z, Chen LL, Meng X, Zhang C, et al. SARS-CoV-2 Omicron  
769 variant shows less efficient replication and fusion activity when compared with Delta  
770 variant in TMPRSS2-expressed cells. *Emerg Microbes Infect*. 2022 Dec;11(1):277-83.  
771 PubMed PMID: 34951565. Pubmed Central PMCID: PMC8774049.
- 772 32. Vanderheiden A, Ralfs P, Chirkova T, Upadhyay AA, Zimmerman MG, Bedoya S,  
773 et al. Type I and Type III Interferons Restrict SARS-CoV-2 Infection of Human Airway  
774 Epithelial Cultures. *J Virol*. 2020 Sep 15;94(19). PubMed PMID: 32699094. Pubmed  
775 Central PMCID: PMC7495371. Epub 2020/07/24.
- 776 33. Schroeder S, Pott F, Niemeyer D, Veith T, Richter A, Muth D, et al. Interferon  
777 antagonism by SARS-CoV-2: a functional study using reverse genetics. *Lancet Microbe*.  
778 2021 May;2(5):e210-e8. PubMed PMID: 33969329. Pubmed Central PMCID:  
779 PMC8096348. Epub 20210304.
- 780 34. Anantharaj A, Gujjar S, Verma N, Khan NA, Shaman H, Sharanabasava P, et al.  
781 Resolution of viral load in mild COVID-19 patients is associated with both innate and  
782 adaptive immune responses. *Journal of Clinical Virology*. 2022  
783 2022/01/01/;146:105060.
- 784 35. Bojkova D, Rothenburger T, Ciesek S, Wass MN, Michaelis M, Cinatl J. SARS-  
785 CoV-2 Omicron variant virus isolates are highly sensitive to interferon treatment.  
786 *bioRxiv*. 2022:2022.01.20.477067.
- 787 36. Desingu PA, Nagarajan K, Dhama K. Emergence of Omicron third lineage BA.3  
788 and its importance. *Journal of Medical Virology*. 2022;94(5):1808-10.
- 789 37. Medigeshi G, Batra G, Murugesan DR, Thiruvengadam R, Chattopadhyay S, Das  
790 B, et al. Sub-optimal Neutralisation of Omicron (B.1.1.529) Variant by Antibodies  
791 induced by Vaccine alone or SARS-CoV-2 Infection plus Vaccine (Hybrid Immunity)  
792 post 6-months. *medRxiv*. 2022:2022.01.04.22268747.
- 793 38. Lyngse FP, Kirkeby CT, Denwood M, Christiansen LE, Mølbak K, Møller CH, et  
794 al. Transmission of SARS-CoV-2 Omicron VOC subvariants BA.1 and BA.2: Evidence  
795 from Danish Households. *medRxiv*. 2022:2022.01.28.22270044.
- 796 39. Yamasoba D, Kimura I, Nasser H, Morioka Y, Nao N, Ito J, et al. Virological  
797 characteristics of SARS-CoV-2 BA.2 variant. *bioRxiv*. 2022:2022.02.14.480335.
- 798 40. Arora P, Zhang L, Rocha C, Sidarovich A, Kempf A, Schulz S, et al. Comparable  
799 neutralisation evasion of SARS-CoV-2 omicron subvariants BA.1, BA.2, and BA.3. *The*  
800 *Lancet Infectious Diseases*.
- 801 41. Chaturvedi UC, Shrivastava R. Interaction of viral proteins with metal ions: role in  
802 maintaining the structure and functions of viruses. *FEMS Immunol Med Microbiol*. 2005  
803 Feb 1;43(2):105-14. PubMed PMID: 15681139. Pubmed Central PMCID: PMC7110337.
- 804 42. te Velthuis AJ, van den Worm SH, Sims AC, Baric RS, Snijder EJ, van Hemert  
805 MJ. Zn(2+) inhibits coronavirus and arterivirus RNA polymerase activity in vitro and zinc  
806 ionophores block the replication of these viruses in cell culture. *PLoS Pathog*. 2010 Nov



- 807 4;6(11):e1001176. PubMed PMID: 21079686. Pubmed Central PMCID: PMC2973827.  
808 Epub 2010/11/17.
- 809 43. Hillen HS, Kokic G, Farnung L, Dienemann C, Tegunov D, Cramer P. Structure  
810 of replicating SARS-CoV-2 polymerase. *Nature*. 2020 Aug;584(7819):154-6. PubMed  
811 PMID: 32438371. Epub 20200521.
- 812 44. Shimizu H, Saito A, Mikuni J, Nakayama EE, Koyama H, Honma T, et al.  
813 Discovery of a small molecule inhibitor targeting dengue virus NS5 RNA-dependent  
814 RNA polymerase. *PLOS Neglected Tropical Diseases*. 2019;13(11):e0007894.
- 815 45. Eydoux C, Fattorini V, Shannon A, Le TT, Didier B, Canard B, et al. A  
816 fluorescence-based high throughput-screening assay for the SARS-CoV RNA synthesis  
817 complex. *J Virol Methods*. 2021 Feb;288:114013. PubMed PMID: 33166547. Pubmed  
818 Central PMCID: PMC7833800. Epub 20201106.
- 819 46. Nealon J, Cowling BJ. Omicron severity: milder but not mild. *The Lancet*.  
820 2022;399(10323):412-3.
- 821 47. Dan JM, Mateus J, Kato Y, Hastie KM, Yu ED, Faliti CE, et al. Immunological  
822 memory to SARS-CoV-2 assessed for up to 8 months after infection. *Science*. 2021 Feb  
823 5;371(6529). PubMed PMID: 33408181. Pubmed Central PMCID: PMC7919858. Epub  
824 20210106.
- 825 48. Chen J, Wei GW. Omicron BA.2 (B.1.1.529.2): high potential to becoming the  
826 next dominating variant. *ArXiv*. 2022 Feb 10. PubMed PMID: 35169598. Pubmed  
827 Central PMCID: PMC8845508. Epub 20220210.
- 828 49. Gao Y, Cai C, Grifoni A, Muller TR, Niessl J, Olofsson A, et al. Ancestral SARS-  
829 CoV-2-specific T cells cross-recognize the Omicron variant. *Nat Med*. 2022 Jan 14.  
830 PubMed PMID: 35042228. Epub 20220114.
- 831 50. GeurtsvanKessel CH, Geers D, Schmitz KS, Mykytyn AZ, Lamers MM, Bogers S,  
832 et al. Divergent SARS CoV-2 Omicron-reactive T- and B cell responses in COVID-19  
833 vaccine recipients. *Sci Immunol*. 2022 Feb 3:eabo2202. PubMed PMID: 35113647.  
834 Epub 20220203.
- 835 51. Broggi A, Ghosh S, Sposito B, Spreafico R, Balzarini F, Lo Cascio A, et al. Type  
836 III interferons disrupt the lung epithelial barrier upon viral recognition. *Science*. 2020  
837 Aug 7;369(6504):706-12. PubMed PMID: 32527925. Pubmed Central PMCID:  
838 PMC7292499. Epub 2020/06/13.
- 839 52. Major J, Crotta S, Llorian M, McCabe TM, Gad HH, Priestnall SL, et al. Type I  
840 and III interferons disrupt lung epithelial repair during recovery from viral infection.  
841 *Science*. 2020 Aug 7;369(6504):712-7. PubMed PMID: 32527928. Pubmed Central  
842 PMCID: PMC7292500. Epub 2020/06/13.
- 843 53. Hui KPY, Ho JCW, Cheung MC, Ng KC, Ching RHH, Lai KL, et al. SARS-CoV-2  
844 Omicron variant replication in human bronchus and lung ex vivo. *Nature*. 2022  
845 Mar;603(7902):715-20. PubMed PMID: 35104836. Epub 20220201.
- 846 54. McMahan K, Giffin V, Tostanoski LH, Chung B, Siamatu M, Suthar MS, et al.  
847 Reduced pathogenicity of the SARS-CoV-2 omicron variant in hamsters. *Med*. 2022  
848 2022/04/08;3(4):262-8.e4.
- 849 55. Wang H, Li Z, Niu J, Xu Y, Ma L, Lu A, et al. Antiviral effects of ferric ammonium  
850 citrate. *Cell Discov*. 2018;4:14. PubMed PMID: 29619244. Pubmed Central PMCID:  
851 PMC5871618. Epub 20180327.

- 852 56. Maio N, Lafont BAP, Sil D, Li Y, Bollinger JM, Jr., Krebs C, et al. Fe-S cofactors  
853 in the SARS-CoV-2 RNA-dependent RNA polymerase are potential antiviral targets.  
854 Science. 2021 Jul 9;373(6551):236-41. PubMed PMID: 34083449. Pubmed Central  
855 PMCID: PMC8892629. Epub 20210603.
- 856 57. Bastin A, Shiri H, Zanganeh S, Fooladi S, Momeni Moghaddam MA, Mehrabani  
857 M, et al. Iron Chelator or Iron Supplement Consumption in COVID-19? The Role of Iron  
858 with Severity Infection. Biol Trace Elem Res. 2021 Nov 25. PubMed PMID: 34825316.  
859 Pubmed Central PMCID: PMC8614629. Epub 20211125.
- 860 58. Habib HM, Ibrahim S, Zaim A, Ibrahim WH. The role of iron in the pathogenesis  
861 of COVID-19 and possible treatment with lactoferrin and other iron chelators. Biomed  
862 Pharmacother. 2021 Apr;136:111228. PubMed PMID: 33454595. Pubmed Central  
863 PMCID: PMC7836924. Epub 20210113.
- 864 59. Bryant C, Wilks SA, Keevil CW. Rapid inactivation of SARS-CoV-2 on copper  
865 touch surfaces determined using a cell culture infectivity assay. bioRxiv.  
866 2021:2021.01.02.424974.
- 867 60. Govind V, Bharadwaj S, Sai Ganesh MR, Vishnu J, Shankar KV, Shankar B, et  
868 al. Antiviral properties of copper and its alloys to inactivate covid-19 virus: a review.  
869 BioMetals. 2021 2021/12/01;34(6):1217-35.
- 870 61. Raha S, Mallick R, Basak S, Duttaroy AK. Is copper beneficial for COVID-19  
871 patients? Medical Hypotheses. 2020 2020/09/01/;142:109814.
- 872 62. Sagripanti JL, Routson LB, Lytle CD. Virus inactivation by copper or iron ions  
873 alone and in the presence of peroxide. Appl Environ Microbiol. 1993 Dec;59(12):4374-6.  
874 PubMed PMID: 8285724. Pubmed Central PMCID: PMC195916.
- 875 63. Viswanathan T, Misra A, Chan SH, Qi S, Dai N, Arya S, et al. A metal ion orients  
876 SARS-CoV-2 mRNA to ensure accurate 2'-O methylation of its first nucleotide. Nat  
877 Commun. 2021 Jun 2;12(1):3287. PubMed PMID: 34078893. Pubmed Central PMCID:  
878 PMC8172916. Epub 20210602.
- 879 64. Bouvet M, Lugari A, Posthuma CC, Zevenhoven JC, Bernard S, Betzi S, et al.  
880 Coronavirus Nsp10, a critical co-factor for activation of multiple replicative enzymes. J  
881 Biol Chem. 2014 Sep 12;289(37):25783-96. PubMed PMID: 25074927. Pubmed Central  
882 PMCID: PMC4162180. Epub 20140729.
- 883 65. Chen T, Fei CY, Chen YP, Sargsyan K, Chang CP, Yuan HS, et al. Synergistic  
884 Inhibition of SARS-CoV-2 Replication Using Disulfiram/Ebselen and Remdesivir. ACS  
885 Pharmacol Transl Sci. 2021 Apr 9;4(2):898-907. PubMed PMID: 33855277. Pubmed  
886 Central PMCID: PMC8009100. Epub 20210326.
- 887 66. Anantharaj A, Das SJ, Sharanabasava P, Lodha R, Kabra SK, Sharma TK, et al.  
888 Visual Detection of SARS-CoV-2 RNA by Conventional PCR-Induced Generation of  
889 DNAzyme Sensor. Front Mol Biosci. 2020 2020-December-23;7(444):586254. PubMed  
890 PMID: 33425988. Pubmed Central PMCID: PMC7793695. Epub 2021/01/12. English.
- 891 67. Das S, Singh J, Shaman H, Singh B, Anantharaj A, Sharanabasava P, et al.  
892 Antibody response after a single dose of BBV152 vaccine negatively correlates with  
893 pre-existing antibodies and induces a significant but low levels of neutralizing antibodies  
894 to Omicron variant. medRxiv. 2022:2022.02.07.22270612.

895

## 896 SUPPLEMENTARY INFORMATION

897 Supplementary methods and Supplementary figure legends have been provided as a  
898 separate file.

899

## 900 **FIGURE LEGENDS**

901 **Figure 1: Growth curve analysis of B.6, B.1.617.1, and B.1.617.2 variants in Calu-3**  
902 **cells.** Calu-3 cells were infected with 0.01 MOI of SARS-CoV-2 virus B.6, B.1.617.1  
903 (Kappa), and B.1.617.2 (Delta) variants. (A) Virus titer in the culture supernatant  
904 collected at indicated time-points were estimated by plaque assay. Error bars represent  
905 geometric mean with 95% CI. (B) Sub-genomic RNA of N gene was estimated by qRT-  
906 PCR. *RNAse P* was used as internal control for normalization. Error bars represent  
907 geometric mean with 95% CI. (C) Calu-3 cells grown on transwell inserts were infected  
908 with above variants at 0.3 MOI and TEER was monitored at indicated time points.  
909 Values (Mean  $\pm$  SD) are represented as relative to time zero before infection and  
910 statistical significance was determined by comparing the zero hour and 48 h readings  
911 by two-way ANOVA with Dunnett's multiple comparisons test. (D) Viral titers were  
912 measured in supernatants at 48 h pi by focus-forming units. Data are from two or three  
913 independent experiments (Mean  $\pm$  SD). ns: non-significant; \*\*  $P < 0.01$ ; \*\*\*\*  $P < 0.0001$ .

914

## 915 **Figure 2: Kappa and Delta variants of SARS-CoV-2 disrupt epithelial junctions.**

916 Calu-3 cells were grown on transwell inserts and infected with indicated variants of  
917 SARS-CoV-2 at 0.3 MOI. At 48 h pi, cells were fixed and stained with occludin and  $\beta$ -  
918 catenin antibodies. Nucleocapsid antibody was used to visualize the SARS-CoV-2  
919 infection. Appropriate Alexa Fluor dye-conjugated secondary antibodies were used for

920 visualization. Nuclei were stained with DAPI. Images were captured at 100X  
921 magnification. Images were analyzed using cellSens software and Z-projection at  
922 maximum intensity images are shown in the figure. Scale bar is 10  $\mu$ M.

923

924 **Figure 3: Growth kinetics of B.6, B.1.617.2, and B.1.1.529 variants in Calu-3 cells.**

925 (A) Calu-3 cells were infected with above variants of SARS-CoV-2 at 0.3 MOI. Cells  
926 were collected at indicated time points and total RNA was isolated to estimate *N* gene  
927 copy numbers by RT-qPCR. *RNase P* was used as a housekeeping control for  
928 normalization. Error bars represent geometric mean with 95% CI. (B) Viral titers were  
929 measured in supernatants by plaque assay. Error bars represent geometric mean with  
930 95% CI. Statistical significance was estimated by two-way ANOVA with Dunnett's  
931 multiple comparisons test. (C) Western blot analysis of cell lysates prepared from  
932 infected cells at indicated time points to detect the expression of SARS-CoV-2  
933 nucleocapsid. GAPDH was used as a loading control. Numbers on the left indicate the  
934 size of the bands in molecular weight marker. (D) Calu-3 cells were infected at 5 MOI  
935 and the amount of internalized RNA was estimated by RT-qPCR as described above.  
936 Data are from two independent experiments. Error bars represent geometric mean with  
937 95% CI. Statistical significance was estimated by Kruskal-Wallis test with Dunn's  
938 multiple comparison test. ns: non-significant, \*  $P < 0.05$ , \*\*  $P < 0.01$ , \*\*\*  $P < 0.001$ , \*\*\*\*  
939  $P < 0.0001$ .

940

941 **Figure 4: Antiviral response with B.6, B.1.617.2, and B.1.1.529 variants.** Calu-3

942 cells were infected with indicated variants of SARS-CoV-2 at 0.3 MOI. Cells were

943 collected at indicated time-points and total RNA was isolated. RT-qPCR was set up to  
944 determine the expression of (A) *IFN-β*. (b) *IFN-λ1*, (C) *ISG-15*, and (D) *OAS1*. *GAPDH*  
945 was used as house-keeping control for normalization. Data are from two independent  
946 experiments (Mean ± SD). Statistical significance was estimated by two-way ANOVA  
947 with Tukey's multiple comparisons test. ns: non-significant, \* P<0.05, \*\* P<0.01, \*\*\*  
948 P<0.001, \*\*\*\* P<0.0001.

949  
950 **Figure 5: Omicron variant has milder effect on epithelial junctions.** Calu-3 cells  
951 were grown on transwell inserts under air-liquid interface (ALI) conditions. Cells were  
952 infected with Delta and Omicron variants at 0.3 MOI. (A) Graph indicates TEER values  
953 relative to mock infection after infection at indicated time points from two independent  
954 experiments. (Mean and error with range). Statistical significance was estimated by two-  
955 way ANOVA with Tukey's multiple comparisons test. (B) Viral titers were measured in  
956 supernatants by focus-forming units. Error bars represent (Mean ± SD) (C) At 36 h pi,  
957 cells were fixed and stained with occludin, β-catenin and SARS-CoV-2 nucleocapsid  
958 antibody followed by Alexa Fluor dye-conjugated secondary antibodies for visualization.  
959 Nuclei were stained with DAPI. Images were captured at 100X magnification. Images  
960 were analyzed using cellSens software and Z-projection images with maximum intensity  
961 are shown in the figure. Scale bar is 10 μM. ns: non-significant, \*\*\*\* P<0.0001.

962  
963 **Figure 6: Omicron infection induces cross-protective antibodies:** Calu-3 cells were  
964 infected with BA.1 and BA.2 sub-lineages of the Omicron variant at 0.3 MOI. Cells were  
965 collected at indicated time points and RNA was isolated. (A) SARS-CoV-2 N sub-

966 genomic copy numbers were estimated using RT-qPCR. *RNase P* was used as a  
967 housekeeping control. (B) Viral titers were measured in supernatants by plaque assay.  
968 Error bars represent geometric mean value with 95% CI (C) Binding antibodies to  
969 nucleocapsid (N) and (D) RBD were estimated by quantitative ELISA for the three time-  
970 points post-vaccination as indicated (n=15). (E) Neutralizing antibody titers to Delta  
971 variant and (F) Omicron variant was determined in the same samples by FRNT assay.  
972 (G) Neutralizing antibody titers to the BA.1 and BA.2 sub-lineages were determined in  
973 samples from participants that were RT-PCR positive during the ongoing Omicron-  
974 induced surge in COVID-19 cases (n=19). Statistical significance was estimated by  
975 Kruskal-Wallis test with Dunn's multiple comparison test. ns: not significant. \* P<0.05,  
976 \*\*\*\* P<0.0001.

977

978 **Figure 7: Iron and copper salts significantly inhibits SARS-CoV-2 infection.** (A)  
979 SARS-CoV-2 RdRp activity assay was performed in the presence of indicated  
980 concentrations of CaCl<sub>2</sub>/CuCl<sub>2</sub>/FeSO<sub>4</sub>/ZnSO<sub>4</sub> in the standard reaction mix containing  
981 MgCl<sub>2</sub> and MnCl<sub>2</sub> and the RdRp complex (nsp7-nsp8-nsp12) of SARS-CoV-2. (B) RdRp  
982 assays were performed in the presence of varying of concentrations of ZnSO<sub>4</sub> or (C)  
983 FeSO<sub>4</sub> to determine the IC<sub>50</sub> values. To determine the effect of metal ions in infection,  
984 Calu-3 cells were infected with indicated variants at 0.3 MOI and media containing 50  
985 μM each of the indicated salts were added after virus adsorption. At 24 h pi,  
986 supernatants were collected and viral titers were measured by plaque assay. The graph  
987 indicates the virus titers of (D) Delta and (E) Omicron variants. Data are from two or  
988 three independent experiments. Error bars represent geometric mean with 95% CI.

989 Statistical significance was estimated by Kruskal-Wallis test with Dunn's multiple  
990 comparison test. ns: non-significant, \*  $P < 0.05$ , \*\*  $P < 0.01$ , \*\*\*  $P < 0.001$ , \*\*\*\*  $P < 0.0001$ .



**Figure 1**

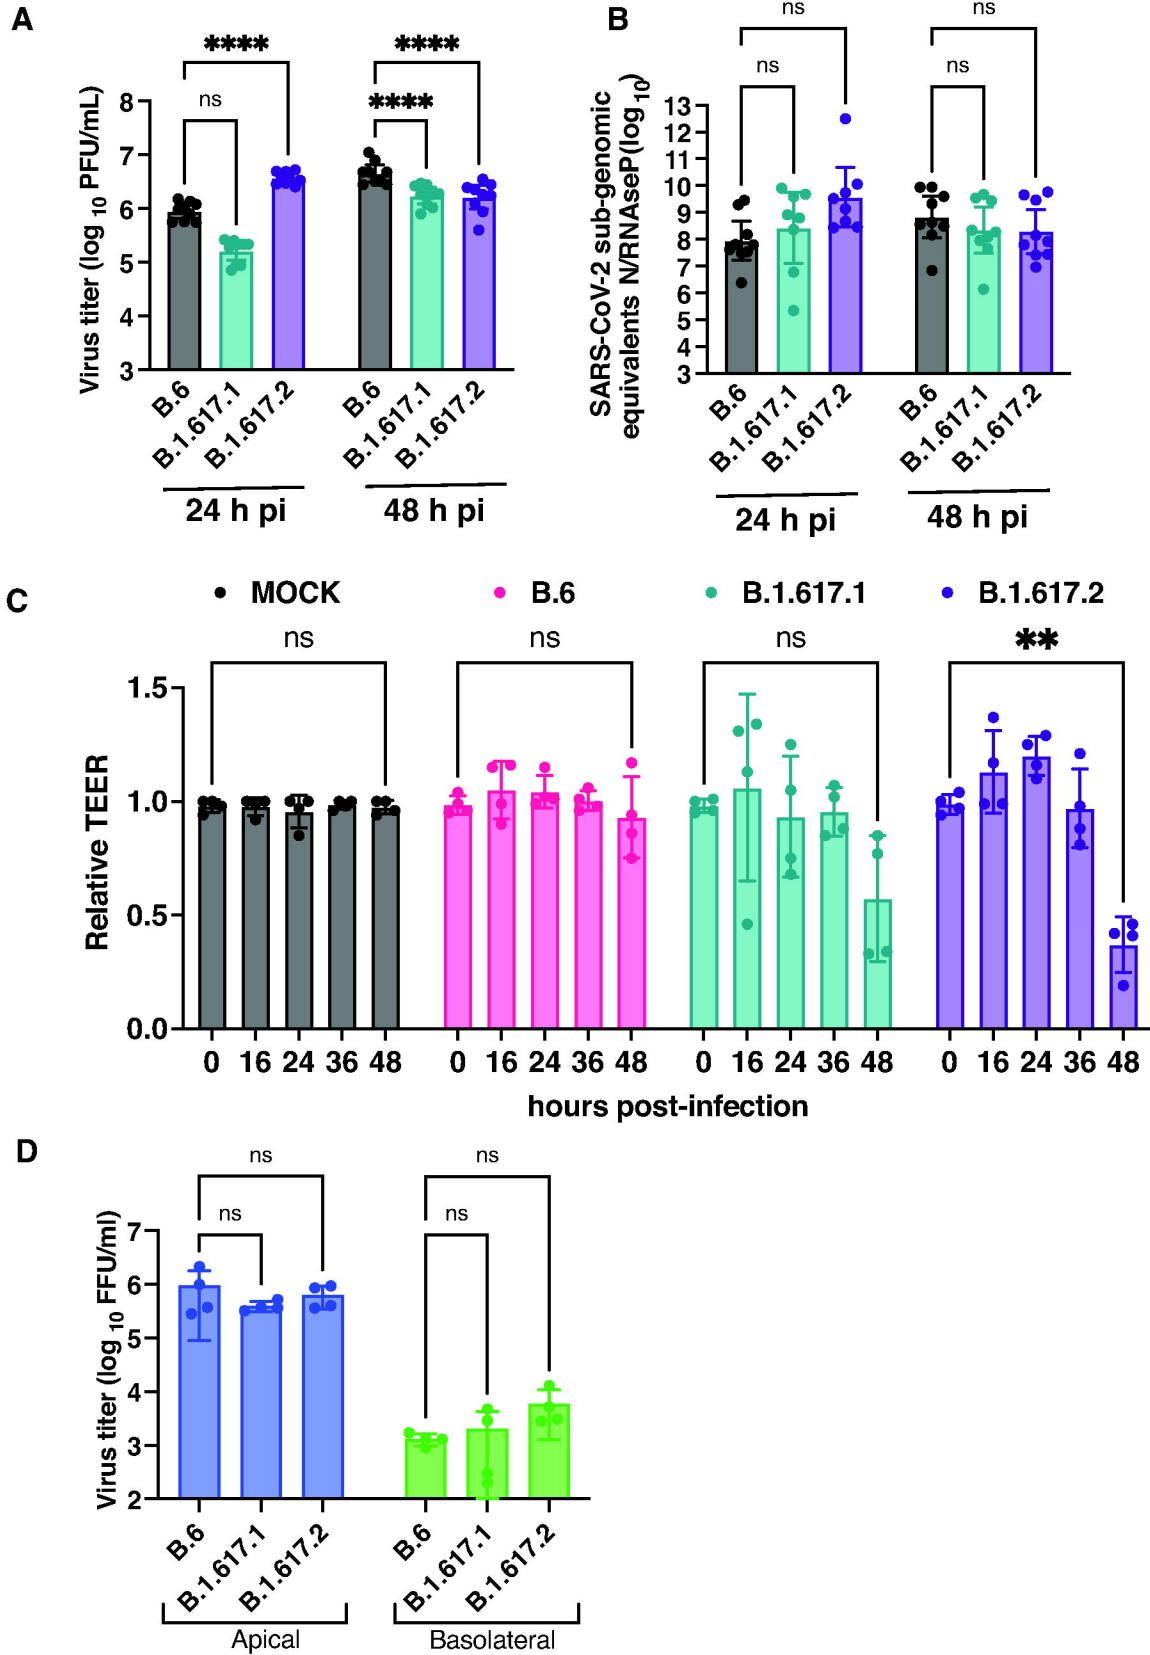



**Figure 2**

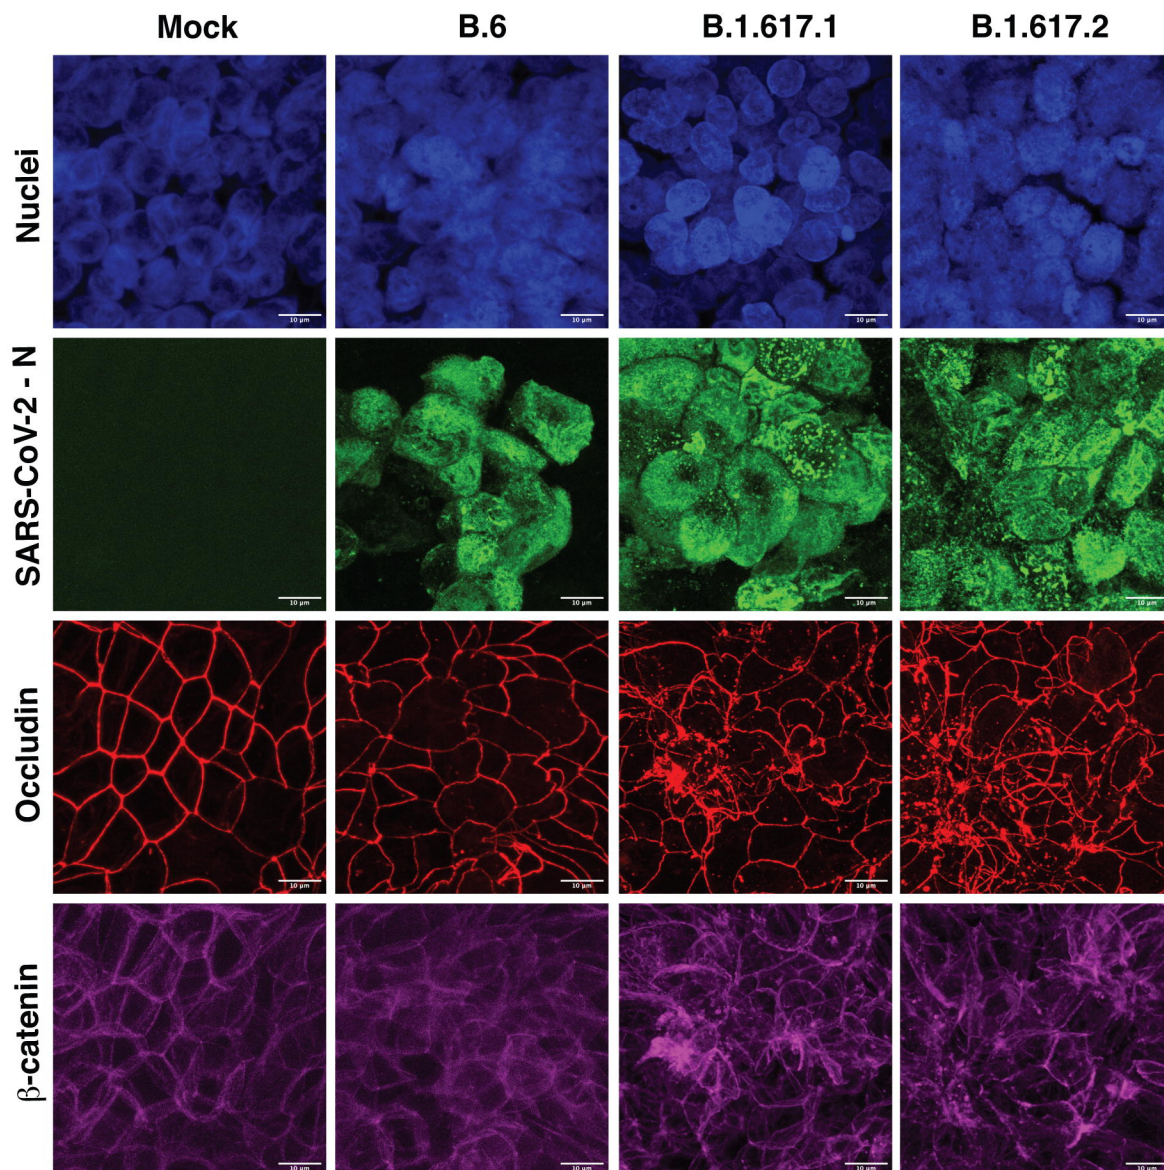

**Figure 3**

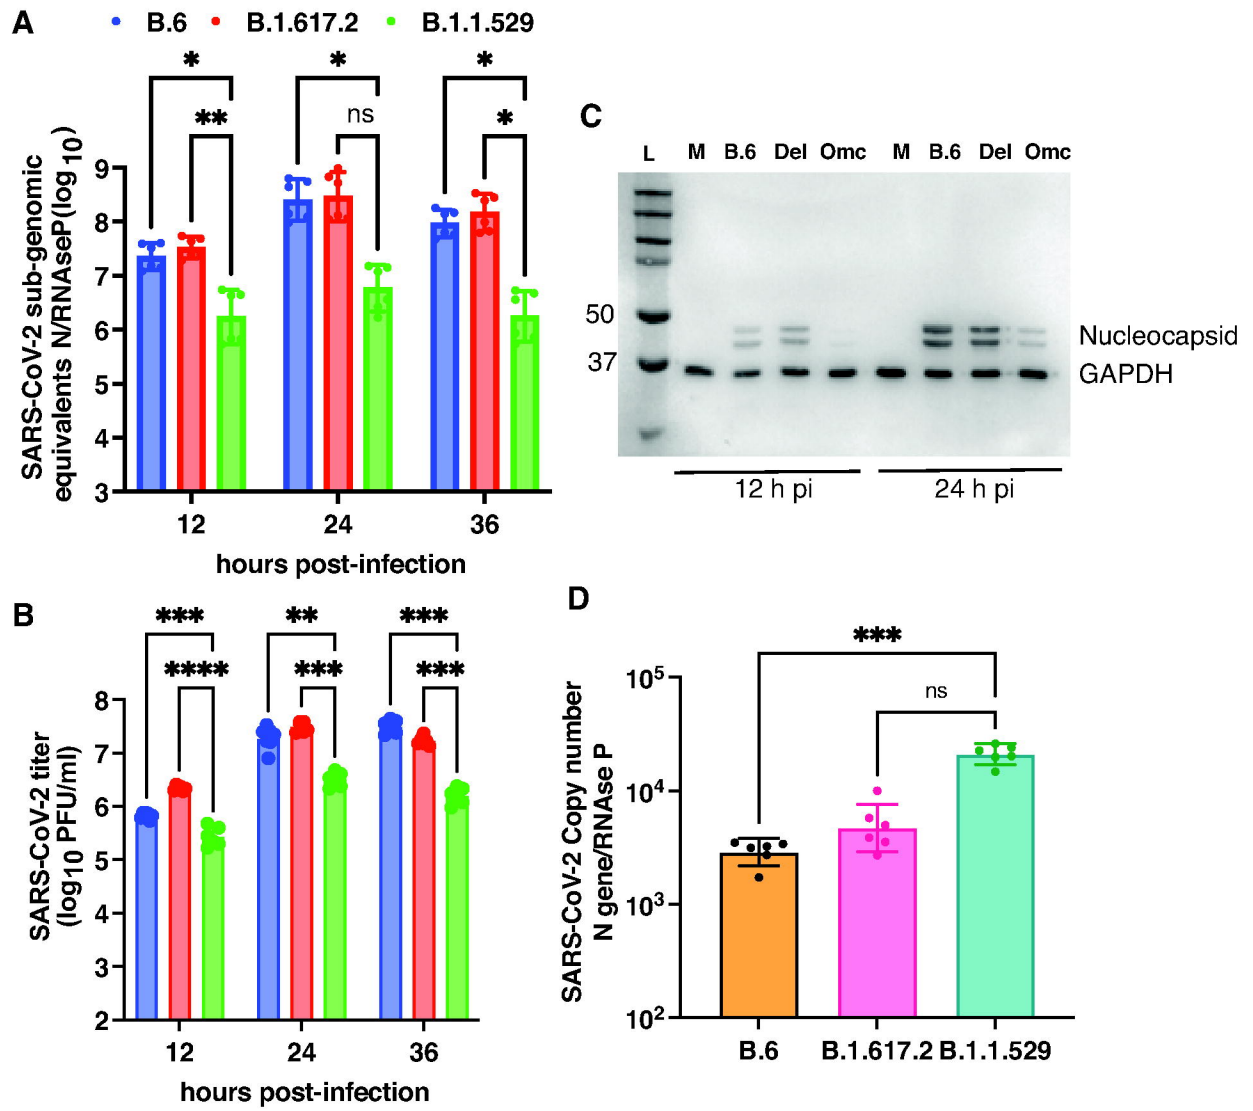

Figure 4

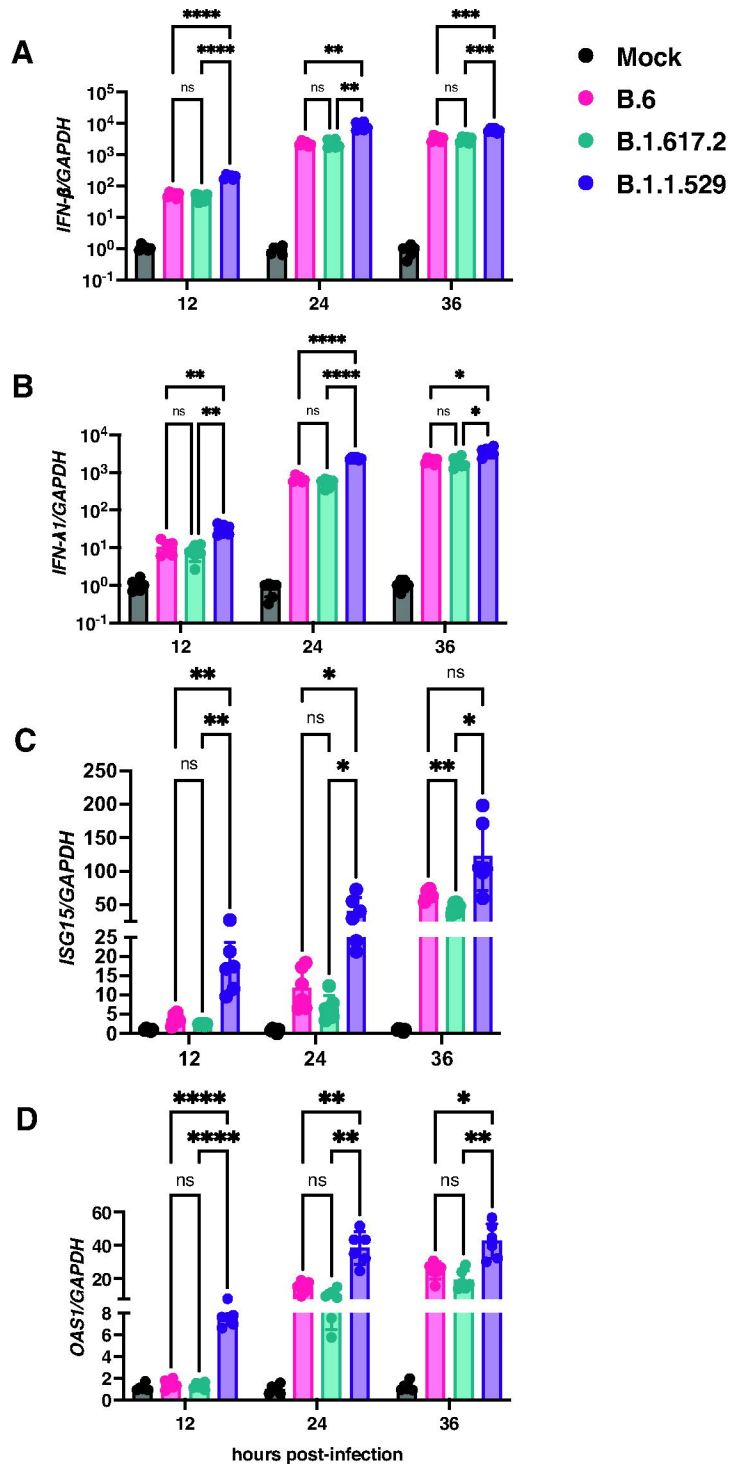

**Figure 5**

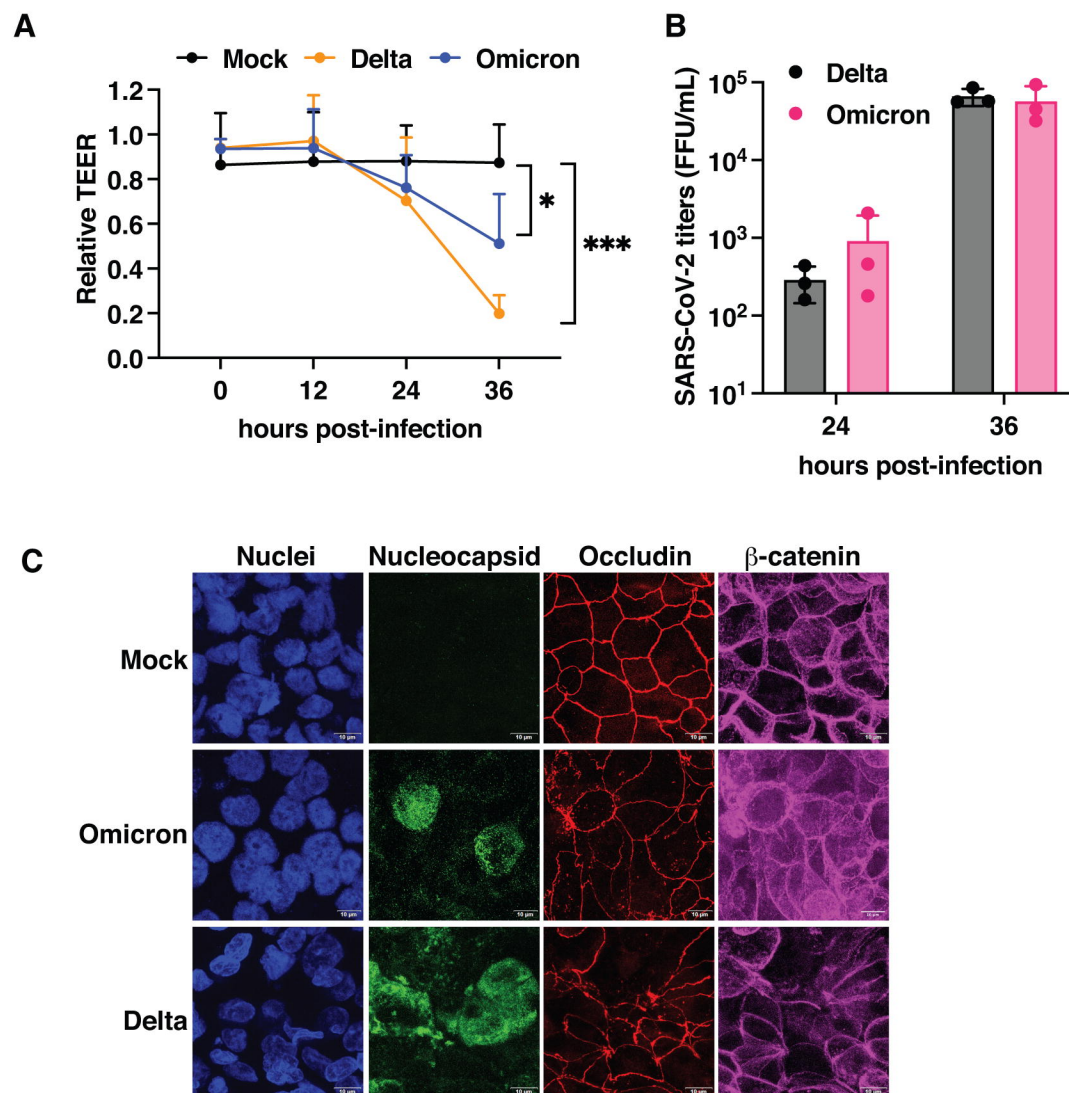



**Figure 6**

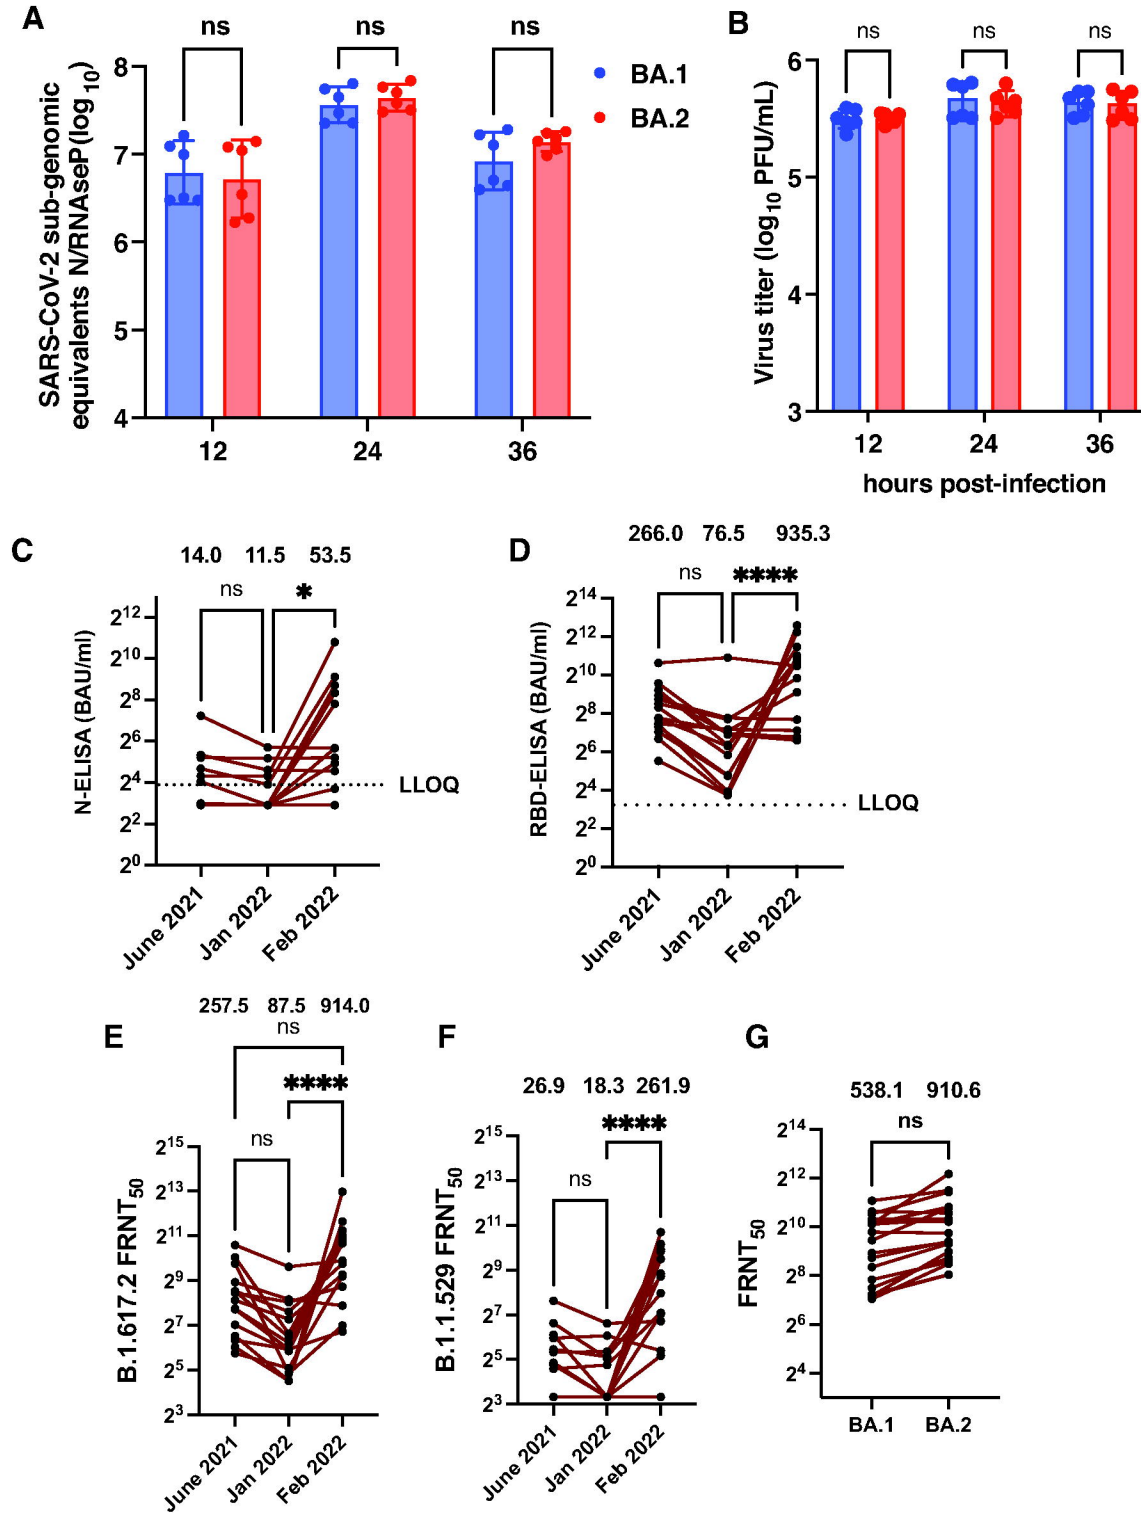

Source: http://medrxiv.org/content/10.1101/2022.01.28.22269990v3.full.pdf
